# Supplementary material for: 1,4-Additions of tricyclic 1,4-diphosphinines – a novel system to study σ-bond activation and π–π dispersion interactions
Source: Royal Society of Chemistry journal article supplement (doi:10.1039/c7cc09349g), 2018-01-01
Supplement: c7cc09349g1.pdf [file c7cc09349g1.pdf]

Supporting Information for

1,4-Additions of tricyclic 1,4-diphosphinines – a novel system to study  $\sigma$ -bond activation and  $\pi$ - $\pi$  dispersion interactions

*Abhishek Koner,<sup>a</sup> Zsolt Kelemen,<sup>b</sup> Gregor Schnakenburg,<sup>a</sup> Laszlo Nyulaszi\*<sup>b</sup> and Rainer Streibel\*<sup>a</sup>*

*<sup>a</sup> Institut für Anorganische Chemie, Rheinische Friedrich-Wilhelms-Universität Bonn, Gerhard-Domagk-Straße 1, D-53121 Bonn, Germany. Email: [r.streibel@uni-bonn.de](mailto:r.streibel@uni-bonn.de).*

*<sup>b</sup>Department of Inorganic and Analytical Chemistry, Budapest University of Technology and Economics, Szt Gellert ter 4, 1111 Budapest, (Hungary), Email: [nyulaszi@mail.bme.hu](mailto:nyulaszi@mail.bme.hu)*

## Contents

|                                                                                                                                                                                                       |    |
|-------------------------------------------------------------------------------------------------------------------------------------------------------------------------------------------------------|----|
| 1. General Considerations .....                                                                                                                                                                       | 4  |
| 2. Common protocol for 2a,b .....                                                                                                                                                                     | 4  |
| 2.1 Compound 2a .....                                                                                                                                                                                 | 4  |
| <i>Analytical data</i> .....                                                                                                                                                                          | 4  |
| Figure 1. <sup>1</sup> H NMR spectrum of 2a in CDCl <sub>3</sub> (300.1 MHz, 25 °C) .....                                                                                                             | 5  |
| Figure 2. <sup>13</sup> C { <sup>1</sup> H} NMR spectrum of 2a in CDCl <sub>3</sub> (75.5 MHz, 25 °C) .....                                                                                           | 5  |
| Figure 3. <sup>31</sup> P NMR spectrum of 2a in CDCl <sub>3</sub> (121.5 MHz, 25 °C) .....                                                                                                            | 6  |
| 2.2 Compound 2b .....                                                                                                                                                                                 | 6  |
| <i>Analytical data</i> .....                                                                                                                                                                          | 6  |
| Figure 4. <sup>1</sup> H NMR spectrum of 2b in CDCl <sub>3</sub> (300.1 MHz, 25 °C) .....                                                                                                             | 7  |
| Figure 5. <sup>13</sup> C { <sup>1</sup> H} NMR spectrum of 2b in CDCl <sub>3</sub> (75.5 MHz, 25 °C) .....                                                                                           | 7  |
| Figure 6. <sup>31</sup> P NMR spectrum of 2b in CDCl <sub>3</sub> (121.5 MHz, 25 °C) .....                                                                                                            | 8  |
| 3. Synthetic protocol for Compounds 3a,b .....                                                                                                                                                        | 9  |
| 3.1 Compound 3a .....                                                                                                                                                                                 | 9  |
| <i>Analytical data</i> .....                                                                                                                                                                          | 9  |
| Figure 10. <sup>1</sup> H NMR spectrum of 3a in THF-d <sub>8</sub> (300.1 MHz, 25 °C) .....                                                                                                           | 9  |
| Figure 11. <sup>13</sup> C { <sup>1</sup> H} NMR spectrum of 3a in THF-d <sub>8</sub> (75.5 MHz, 25 °C) .....                                                                                         | 10 |
| Figure 12. <sup>31</sup> P NMR spectrum of 3a in THF-d <sub>8</sub> (116.6 MHz, 25 °C) .....                                                                                                          | 10 |
| 3.2 Compound 3b .....                                                                                                                                                                                 | 11 |
| <i>Analytical data for 3b</i> .....                                                                                                                                                                   | 11 |
| Figure 13. <sup>1</sup> H NMR spectrum of 3b in CDCl <sub>3</sub> (300.1 MHz, 25 °C) .....                                                                                                            | 11 |
| Figure 14. <sup>13</sup> C { <sup>1</sup> H} NMR spectrum of 3b in CDCl <sub>3</sub> (75.5 MHz, 25 °C) .....                                                                                          | 12 |
| Figure 15. <sup>31</sup> P NMR spectrum of 3b in CDCl <sub>3</sub> (121.5 MHz, 25 °C) .....                                                                                                           | 12 |
| X-ray data of the compounds .....                                                                                                                                                                     | 13 |
| Compound 2a .....                                                                                                                                                                                     | 13 |
| Compound 2b .....                                                                                                                                                                                     | 13 |
| Compound 3a .....                                                                                                                                                                                     | 14 |
| Compound 3b .....                                                                                                                                                                                     | 14 |
| 4. Computation details .....                                                                                                                                                                          | 16 |
| Table 1. Reaction energies and Gibbs free energies of the [4π+2π]-cyclo-addition reactions and the related reaction barriers in kcal.mol <sup>-1</sup> unit at M06-2X/6-311+G** level of theory ..... | 16 |
| Figure 16. Gibbs free energy profile of the possible formation of 3a' and 3b' compounds via 3cis intermediate at M06-2X/6-311+G** level of theory and in kcal.mol <sup>-1</sup> unit .....            | 17 |

|                                                                                                                                                                                            |    |
|--------------------------------------------------------------------------------------------------------------------------------------------------------------------------------------------|----|
| Figure 17. Gibbs free energy profile of the possible formation of 3a' and 3b' compounds via 3ipso intermediate at M06-2X/6-311+G** level of theory and in kcal.mol <sup>-1</sup> unit..... | 17 |
| Figure 18. The in/in, in/out and out/out rotamers of 3a' .....                                                                                                                             | 18 |
| Table 2. Relative stability of the different rotamers in case of 3a' and 3b' at M06-2X-6-311+G** level of theory and in kcal/mol unit .....                                                | 18 |
| Table 3. NICS(0) and NICS(1) values of the rotamers of 3a' .....                                                                                                                           | 18 |
| Table 4. NICS(0) and NICS(1) values of the rotamers of 4a' .....                                                                                                                           | 19 |
| XYZ geometries and total energies of the investigated systems .....                                                                                                                        | 19 |
| References .....                                                                                                                                                                           | 52 |

## 1. General Considerations

The lithiation/phosphanylation reactions were executed carefully under an argon atmosphere, using standard Schlenk-line techniques and dry solvents. Tetrahydrofuran, diethyl ether, pentane and toluene were dried over sodium wire/benzophenone, dichloro-methane over calcium hydride and further purified by subsequent distillation. All NMR spectra were recorded on a Bruker AX-300 spectrometer (300.1 MHz for  $^1\text{H}$ , 75.5 MHz for  $^{13}\text{C}$ , 121.5 MHz for  $^{31}\text{P}$ ). The  $^1\text{H}$  and  $^{13}\text{C}$  spectra were referenced to the residual proton resonances and the  $^{13}\text{C}$  signals of the deuterated solvents and  $^{31}\text{P}$  signals to 85%  $\text{H}_3\text{PO}_4$  as the external standard, respectively. Elemental analyses were carried out on a Elementar Vario Micro elemental analyzer. Melting points were determined in one side melted off capillaries using Büchi Type apparatus. Mass spectrometric data were collected on a Kratos MS 50 spectrometer using EI, 70 eV. The X-ray diffraction analyses were performed on a Bruker D8-Venture or a Bruker X8-KappaApex TT type diffractometer at 123(2) or 100(2) K, respectively. The structures were solved by direct methods refined by the full matrix least-squares technique in anisotropic approximation for non-hydrogen atoms using the SHELXS97 and SHELXL9725 program packages. Hydrogen atoms were located from Fourier synthesis and refined isotopically. The crystallographic data for the structures reported in this paper have been deposited in the Cambridge Crystallographic Data Centre having the corresponding numbers: 1589254 (**2a**), 1589255 (**2b**), 1589256 (**3a**) and 1589257 (**3b**).

## 2. Common protocol for 2a,b

A solution of **1** (0.48 g, 1 mmol) in toluene (20 ml) was heated with 0.12 ml of dimethyl acetylene dicarboxylate (for **2a**; heated for 1 h at 50 °C) or *N*-phenylmaleimide (0.17 g for **2b**; heated at 110 °C for 3h) in a Schlenk tube. The color of the reaction mixture turned dark reddish brown for **2a** and light red-orange for **2b**. Afterwards the solvent was removed under reduced pressure ( $8 \times 10^{-3}$  mbar) and the residue was washed with *n*-pentane (3×5 ml). Finally it was dried under vacuum ( $8 \times 10^{-3}$  mbar) to get **2a,b** in pure form.

### 2.1 Compound 2a

#### Analytical data

**2a**: Yield: 0.59 g (0.95 mmol, 95.0 %) , brick red powder. m.p. decom. at 180°C.  $^1\text{H}$  NMR (300 MHz,  $\text{CDCl}_3$ ):  $\delta$  = 0.99 (t, 12H,  $^3J_{\text{H,H}} = 7.3$  Hz,  $\text{NCH}_2\text{CH}_2\text{CH}_2\text{Me}$ ), 1.39 (tq, 8H,  $^3J_{\text{H,H}} = 7.3$  Hz = 14.9 Hz,  $^3J_{\text{H,H}} = 7.49$  Hz,  $\text{NCH}_2\text{CH}_2\text{CH}_2\text{Me}$ ), 1.69-1.86 (m, 8H,  $\text{NCH}_2\text{CH}_2\text{CH}_2\text{Me}$ ), 3.87 (s, 6H,  $-\text{CO}_2\text{Me}$ ), 4.27 (t, 8H,  $^3J_{\text{H,H}} = 7.4$  Hz,  $\text{NCH}_2\text{CH}_2\text{CH}_2\text{Me}$ ).  $^{13}\text{C}$  NMR (75.0 MHz,  $\text{CDCl}_3$ ):  $\delta$  = 13.8 (s,  $\text{NCH}_2\text{CH}_2\text{CH}_2\text{Me}$ ), 20.1 (s,  $\text{NCH}_2\text{CH}_2\text{CH}_2\text{Me}$ ), 31.6 (s,  $\text{NCH}_2\text{CH}_2\text{CH}_2\text{Me}$ ), 47.8 (dd,  $^3J_{\text{P,C}} = 4.6$  Hz,  $\text{NCH}_2\text{CH}_2\text{CH}_2\text{Me}$ ), 53.4 (s,  $-\text{CO}_2\text{Me}$ ), 128.6 (d,  $^1J_{\text{P,C}} = 61.2$  Hz,  $\text{P}-\text{CO}_2\text{Me}$ ), 142.5 (t,  $J_{\text{P,C}} = 4.1$  Hz,  $\text{P}-\text{C}$  of the middle ring), 160.5 (dd,  $^2J_{\text{P,C}} = 14.1$  Hz,  $^2J_{\text{P,C}} = 11.9$  Hz,  $-\text{CO}_2\text{Me}$ ), 164.3 (s,  $\text{C}=\text{S}$ ), 166.1 (dd,  $^2J_{\text{P,C}} = 16.8$  Hz,  $-\text{CO}_2\text{Me}$ ).  $^{31}\text{P}$  NMR (121.5 MHz,  $\text{CDCl}_3$ ):  $\delta$  = -87.3 (s). IR [ $\text{cm}^{-1}$ ]:  $\tilde{\nu}$  = 2957 (w), 2933 (w), 2873 (w), 1721 (s), 1435 (m), 1404 (s), 1245 (s), 1217 (s). MS (EI, 70 eV):  $m/z$  (%) = 624.1 (10) [ $\text{M}]^+$ , 482.2 (100) [ $\text{M}-\text{C}_6\text{H}_6\text{O}_4$ ] $^+$ HRMS: theor./exp. for [ $\text{C}_{28}\text{H}_{42}\text{N}_4\text{O}_4\text{P}_2\text{S}_2$ ]: 624.2123/624.2123. EA [%]: theor./exp. C 53.83/53.55 , H 6.78/6.73, N 8.97/8.82, S 10.26/9.84.

Figure 1.  $^1\text{H}$  NMR spectrum of 2a in  $\text{CDCl}_3$  (300.1 MHz, 25  $^\circ\text{C}$ )

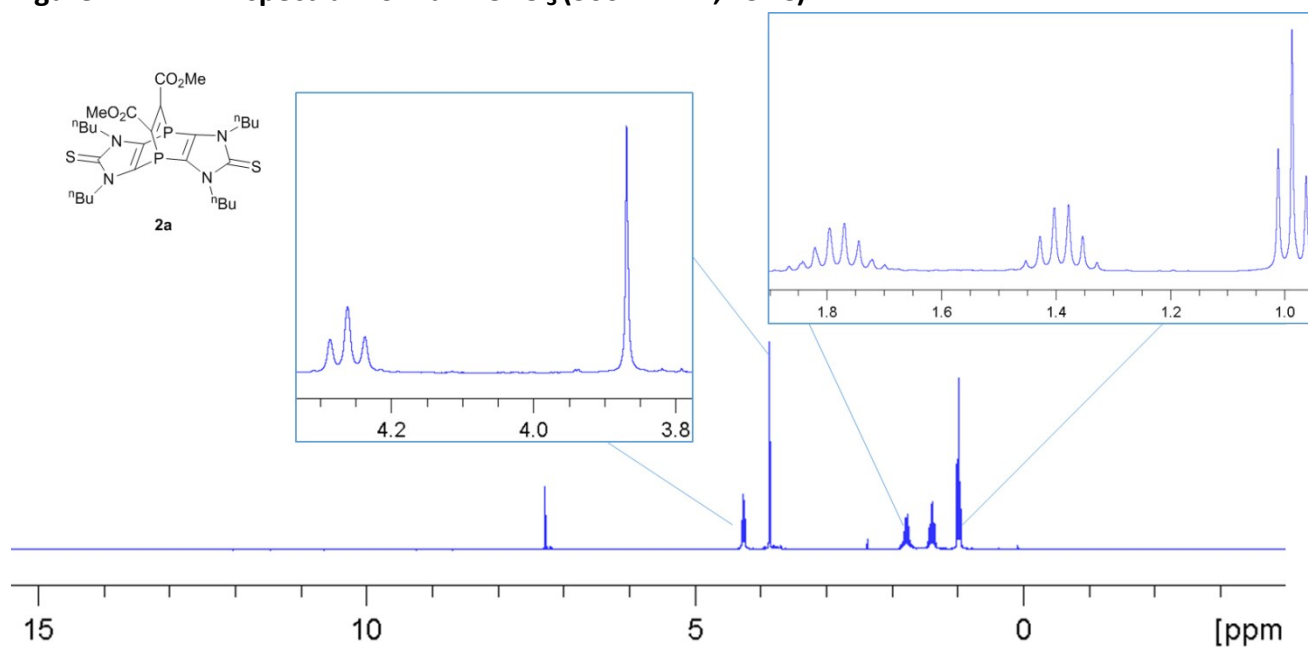

Figure 2.  $^{13}\text{C}$   $\{^1\text{H}\}$  NMR spectrum of 2a in  $\text{CDCl}_3$  (75.5 MHz, 25  $^\circ\text{C}$ )

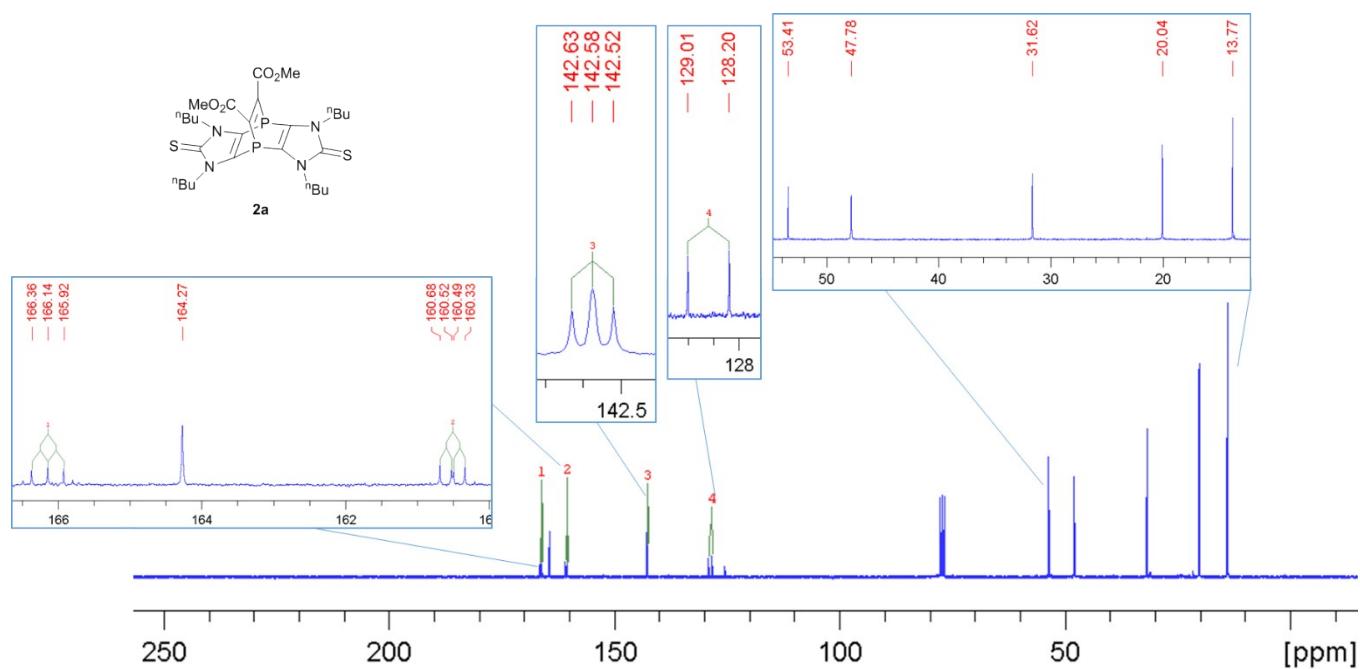

Figure 3.  $^{31}\text{P}$  NMR spectrum of 2a in  $\text{CDCl}_3$  (121.5 MHz, 25 °C)

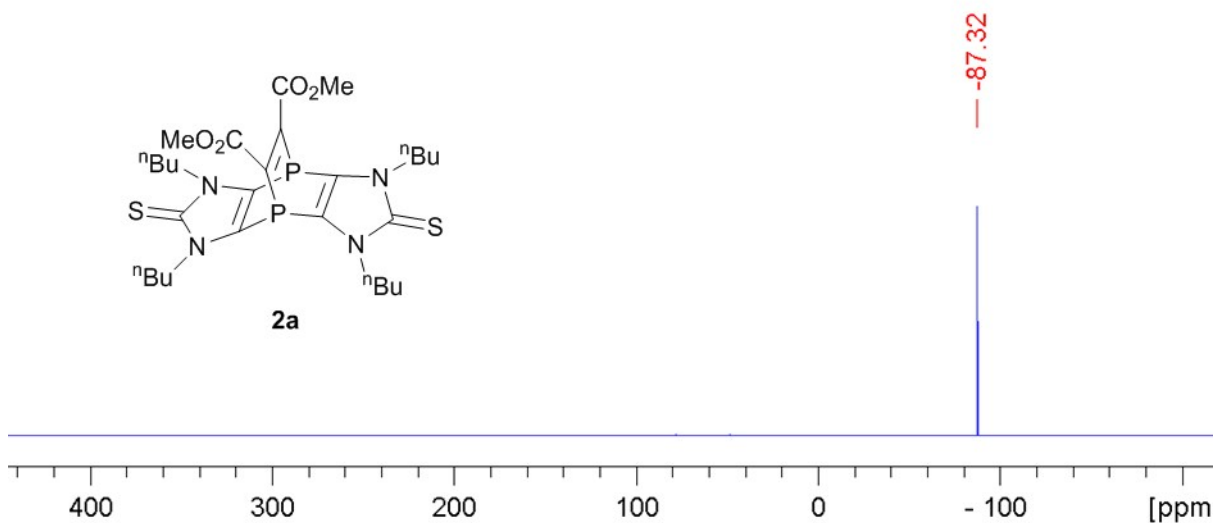

## 2.2 Compound 2b

### Analytical data

**2b:** Yield: 0.59 g (0.91 mmol, 91.0 %), orange powder. m.p. decomp. at 160°C.  $^1\text{H}$  NMR (300 MHz,  $\text{CDCl}_3$ ):  $\delta$  0.89 (t, 6H,  $^3J_{\text{H,H}} = 7.3$  Hz,  $\text{NCH}_2\text{CH}_2\text{CH}_2\text{Me}$ ), 1.01 (t, 6H,  $^3J_{\text{H,H}} = 7.3$  Hz,  $\text{NCH}_2\text{CH}_2\text{CH}_2\text{Me}$ ), 1.29-1.49 (m, 8H,  $\text{NCH}_2\text{CH}_2\text{CH}_2\text{Me}$ ), 1.63-1.84 (m, 8H,  $\text{NCH}_2\text{CH}_2\text{CH}_2\text{Me}$ ), 3.72 (t, 2H,  $^3J_{\text{P,H}} = 4.9$  Hz, P-CH), 4.09-4.39 (m, 8H,  $\text{NCH}_2\text{CH}_2\text{CH}_2\text{Me}$ ), 6.75-7.45 (m, 5H, *Ph ring protons*).  $^{13}\text{C}\{^1\text{H}\}$  NMR (75.0 MHz,  $\text{CDCl}_3$ ):  $\delta = 13.5$  &  $13.8$  (s,  $\text{NCH}_2\text{CH}_2\text{CH}_2\text{Me}$ ), 19.9 & 20.1 (s,  $\text{NCH}_2\text{CH}_2\text{CH}_2\text{Me}$ ), 31.5 & 31.7 (s,  $\text{NCH}_2\text{CH}_2\text{CH}_2\text{Me}$ ), 44.5 (dd,  $^3J_{\text{P,C}} = 8.4$  Hz, P-CH), 47.3 (t,  $^3J_{\text{P,C}} = 1.9$  Hz,  $\text{NCH}_2\text{CH}_2\text{CH}_2\text{Me}$ ), 47.5 (t,  $^3J_{\text{P,C}} = 2.1$  Hz,  $\text{NCH}_2\text{CH}_2\text{CH}_2\text{Me}$ ), 126.3 (s, *Ph ring C*), 129.5 (s, *Ph ring C*), 129.6 (s, *Ph ring C*), 130.5 (s, *Ph ring C*), 133.0 (dd,  $J_{\text{P,C}} = 6.4$  Hz, P-C of the middle ring), 134.5 (dd,  $J_{\text{P,C}} = 3.5$  Hz, P-C of the middle ring), 167.4 (s, C(O)-), 172.4 (t,  $^3J_{\text{P,C}} = 3.3$  Hz, C=S).  $^{31}\text{P}$  NMR (121.5 MHz,  $\text{CDCl}_3$ ):  $\delta = -86.3$  (t,  $^2J_{\text{P,H}} = 4.9$  Hz). IR [ $\text{cm}^{-1}$ ]:  $\tilde{\nu} = 2956$  (w), 2930 (w), 2870 (w), 1768 (w), 1704 (s), 1404 (s), 1373 (s), 1217 (w), 1162 (s). Pos-ESI-MS: for  $\text{C}_{32}\text{H}_{43}\text{N}_5\text{O}_2\text{P}_2\text{S}_2\text{H}$  theor./exp. 656.2417/656.2406. EA [%]:theor./exp. C 58.61/58.02, H 6.61/6.76, N 10.68/10.12, S 9.78/9.10.

Figure 4.  $^1\text{H}$  NMR spectrum of **2b** in  $\text{CDCl}_3$  (300.1 MHz, 25 °C)

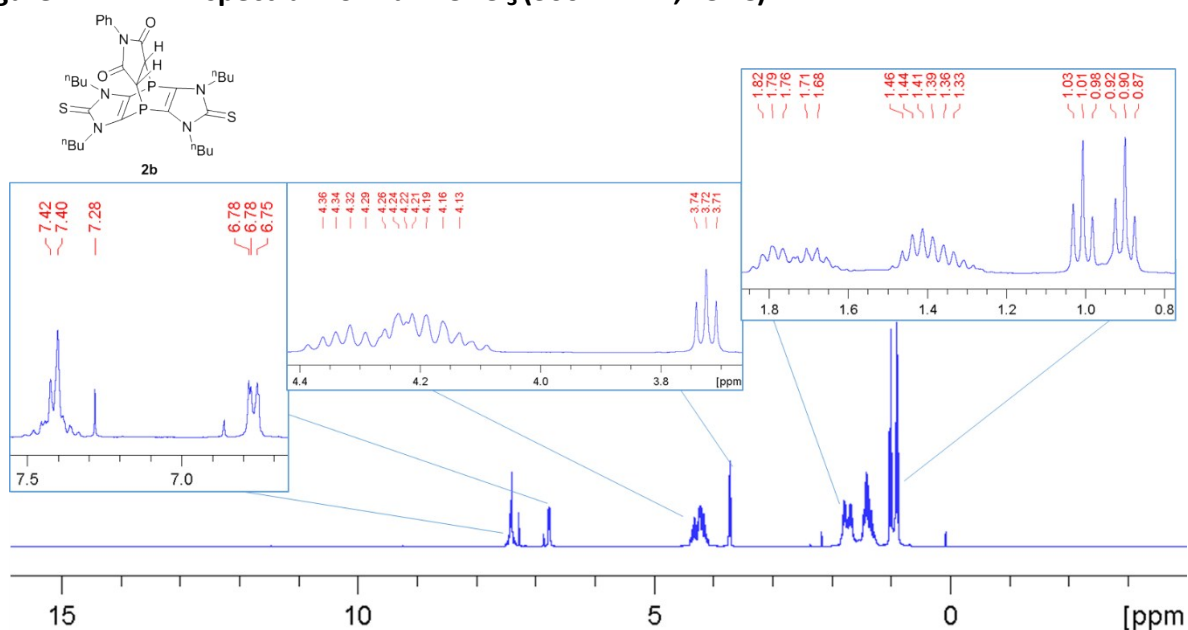

Figure 5.  $^{13}\text{C}$   $\{^1\text{H}\}$  NMR spectrum of **2b** in  $\text{CDCl}_3$  (75.5 MHz, 25 °C)

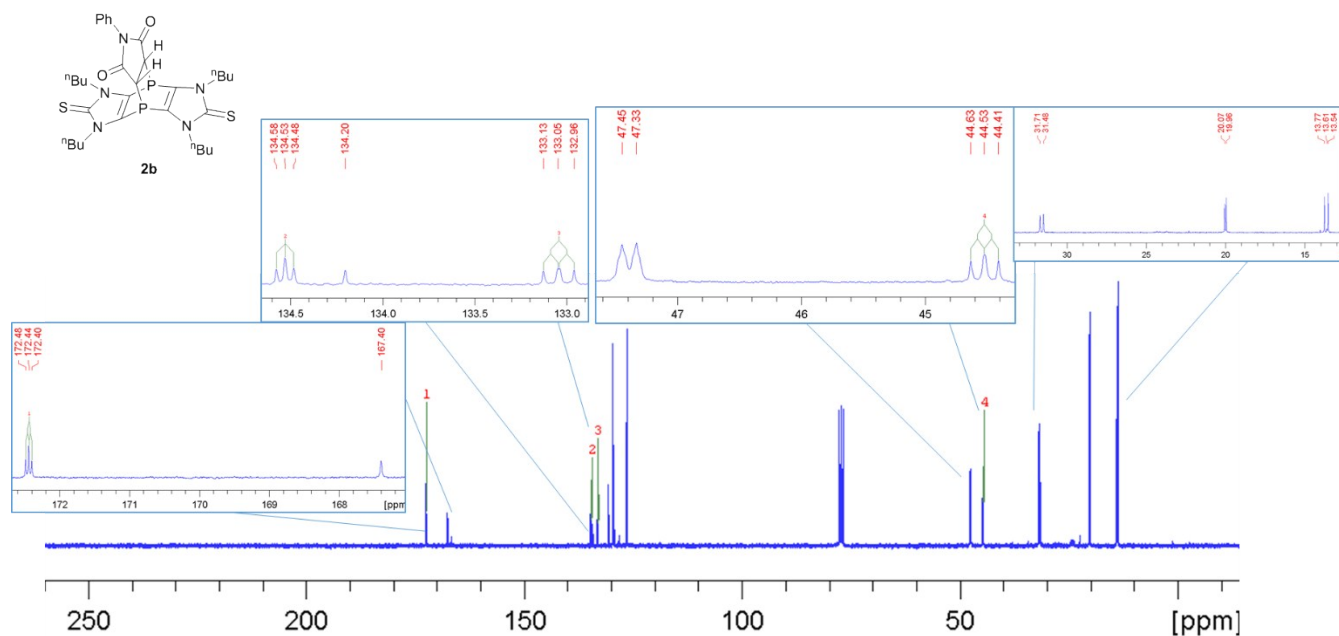

Figure 6.  $^{31}\text{P}$  NMR spectrum of 2b in  $\text{CDCl}_3$  (121.5 MHz, 25 °C)

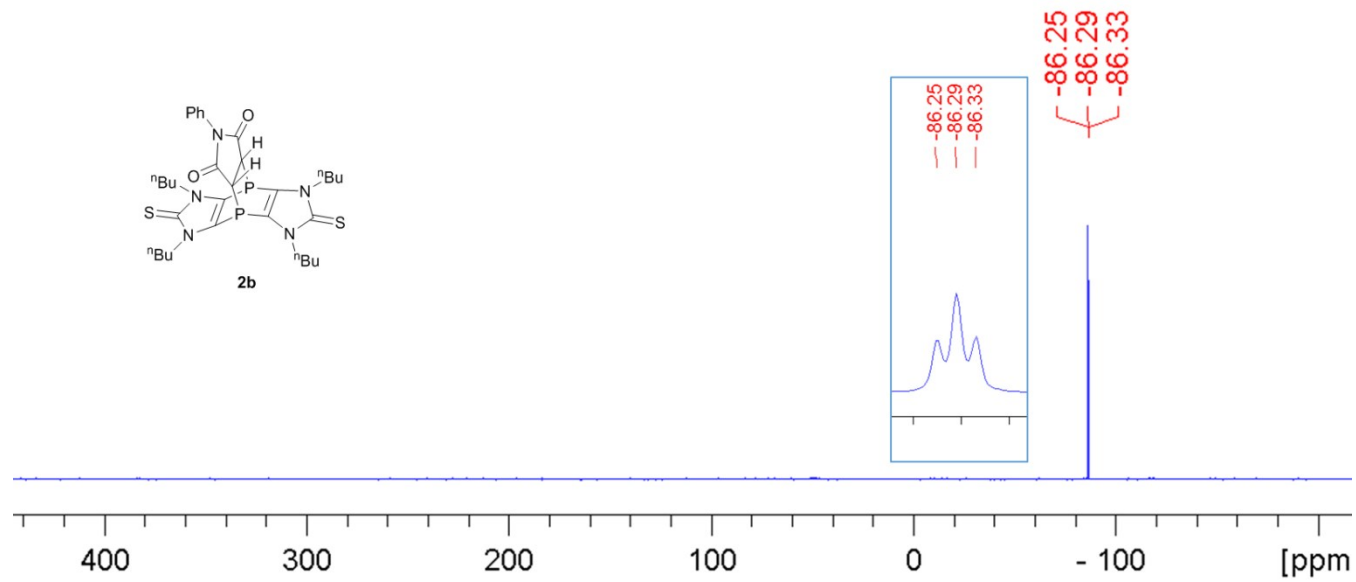



### 3. Synthetic protocol for Compounds 3a,b

A solution of 1 (0.48 g, 1 mmol) in toluene (20 ml) was heated with 0.22 g of diphenyl disulfide (for 3a; heated for 2 days) or 0.31 g of diphenyl diselenide (for 3b; heated for 6h) or 0.41 g of diphenyl ditelluride at 110°C in a Schlenk tube. The color of the reaction mixture turned yellow in cases of Ph<sub>2</sub>S<sub>2</sub> and Ph<sub>2</sub>Se<sub>2</sub> from dark blood red during the course of the reaction. After the complete consumption of the starting materials the solvent was removed under reduced pressure (8× 10<sup>-3</sup> mbar) and Afterwards the solvent was removed under reduced pressure (8× 10<sup>-3</sup> mbar) and the residue was washed with *n*-pentane (3×5 ml). Finally it was dried under vacuum (8× 10<sup>-3</sup> mbar) to get 3a,b in pure form as yellow powders. But in case of Ph<sub>2</sub>Te<sub>2</sub> no reaction could be observed even after heating at 110°C for a week.

#### 3.1 Compound 3a

##### Analytical data

Yield: 0.55 g (0.78 mmol, 78.0 %), yellow powder. M.p. decom. 195°C. <sup>1</sup>H NMR (300 MHz, CDCl<sub>3</sub>): δ = 1.06 (t, 12H, <sup>3</sup>J<sub>H,H</sub> = 7.3 Hz, NCH<sub>2</sub>CH<sub>2</sub>CH<sub>2</sub>Me), 1.42-1.54 (m, 8H, NCH<sub>2</sub>CH<sub>2</sub>CH<sub>2</sub>Me), 1.58-1.73 (m, 4H, NCH<sub>2</sub>CH<sub>2</sub>CH<sub>2</sub>Me), 1.82-1.97 (m, 4H, NCH<sub>2</sub>CH<sub>2</sub>CH<sub>2</sub>Me), 3.98-4.08 (m, 4H, NCH<sub>2</sub>CH<sub>2</sub>CH<sub>2</sub>Me), 4.47-4.57 (m, 4H, NCH<sub>2</sub>CH<sub>2</sub>CH<sub>2</sub>Me), 6.33 (d, 4H, <sup>3</sup>J<sub>H,H</sub> = 7.9 Hz, *o*-protons of Ph ring), 7.07 (t, 4H, <sup>3</sup>J<sub>H,H</sub> = 7.5 Hz, *m*-protons of Ph ring), 7.29 (t, 2H, <sup>3</sup>J<sub>H,H</sub> = 7.5 Hz, *p*-protons of Ph ring). <sup>13</sup>C{<sup>1</sup>H} NMR (75.0 MHz, CDCl<sub>3</sub>): δ 13.8 (s, NCH<sub>2</sub>CH<sub>2</sub>CH<sub>2</sub>Me), 20.1 (s, NCH<sub>2</sub>CH<sub>2</sub>CH<sub>2</sub>Me), 31.1 (s, NCH<sub>2</sub>CH<sub>2</sub>CH<sub>2</sub>Me), 46.9 (t, <sup>3</sup>J<sub>P,C</sub> = 3.4 Hz, NCH<sub>2</sub>CH<sub>2</sub>CH<sub>2</sub>Me), 125.4 (dd, <sup>3</sup>J<sub>P,C</sub> = 7.4 Hz, <sup>3</sup>J<sub>P,C</sub> = 6.5 Hz, *ipso*-C of Ph ring), 126.3 (t, J<sub>P,C</sub> = 4.1 Hz, *p*-C of the middle ring), 128.9 (s, Ph ring C) 129.2 (s, *p*-C of Ph ring), 134.9 (s, Ph ring C), 167.5 (t, <sup>3</sup>J<sub>P,C</sub> = 1.6 Hz C=S). <sup>31</sup>P NMR (121.5 MHz, CDCl<sub>3</sub>, 25 °C): δ = -34.2 (s). IR [cm<sup>-1</sup>]:  $\tilde{\nu}$  = 2958 (w), 2931 (w), 2871 (w), 1436 (s), 1398 (s), 1286 (s), 1216 (s), 1159 (s), 861 (s), 745 (s). Pos-ESI-MS: for C<sub>34</sub>H<sub>46</sub>N<sub>4</sub>P<sub>2</sub>S<sub>4</sub>H theor./exp. 701.2165/701.2153. EA [%]: theor./exp. C 58.26/58.01, H 6.61/6.66, N 7.99/7.83, S 18.29/17.43.

Figure 10. <sup>1</sup>H NMR spectrum of 3a in THF-d<sub>8</sub> (300.1 MHz, 25 °C)

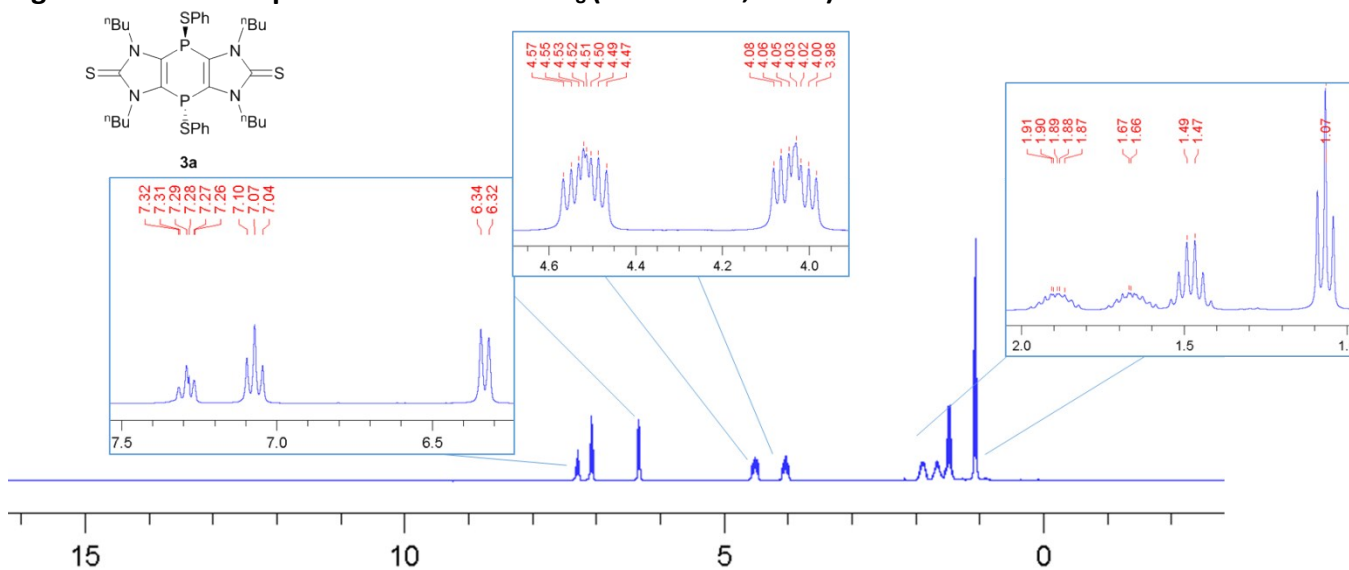

Figure 11.  $^{13}\text{C}$   $\{^1\text{H}\}$  NMR spectrum of **3a** in THF- $d_8$  (75.5 MHz, 25 °C)

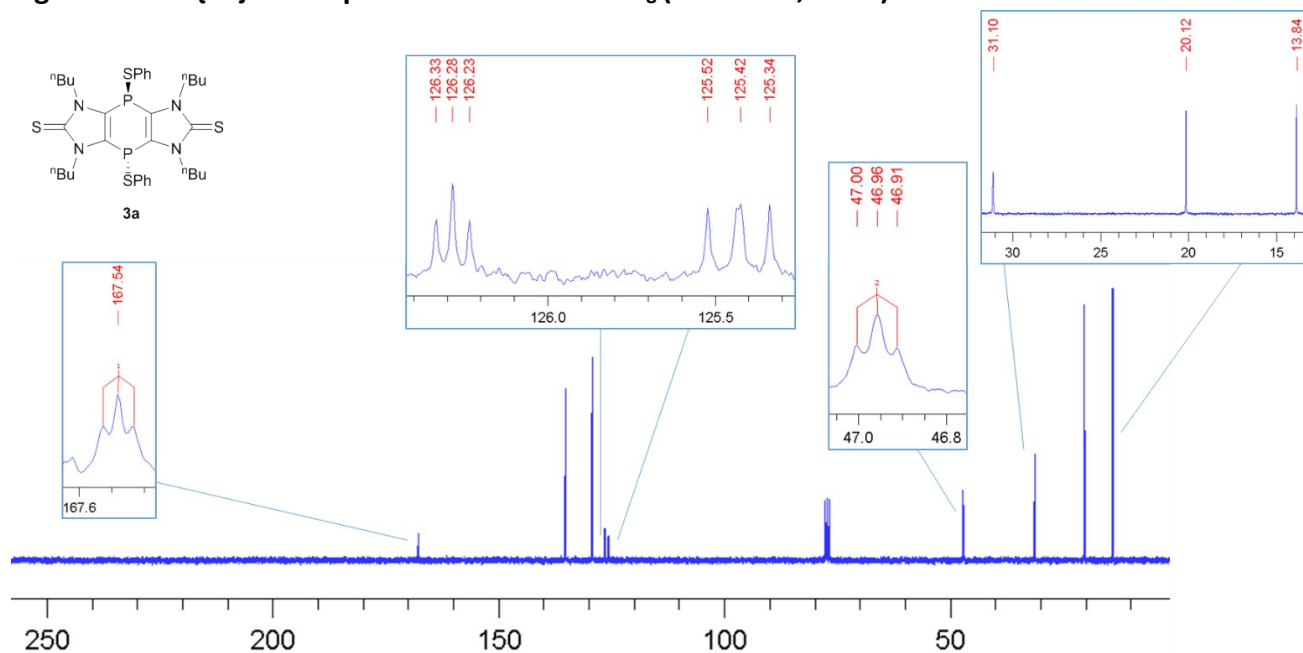

Figure 12.  $^{31}\text{P}$  NMR spectrum of **3a** in THF- $d_8$  (116.6 MHz, 25 °C)

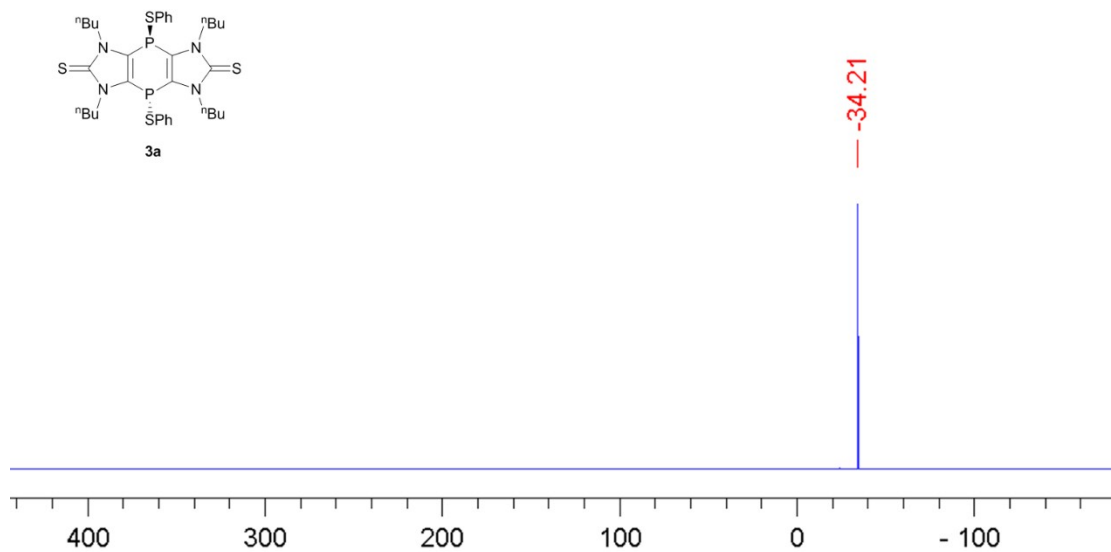

## 3.2 Compound 3b

### Analytical data for 3b

Yield: 0.59 g (0.75 mmol, 75.0 %), yellow solid, m.p.: 188 °C,  $^1\text{H}$  NMR (300.1 MHz,  $\text{C}_6\text{D}_6$ , 25 °C):  $\delta$  = 0.91 (t, 12H,  $^3J_{\text{H,H}} = 7.2$  Hz,  $\text{NCH}_2\text{CH}_2\text{CH}_2\text{Me}$ ), 1.25-1.35 (m, 8H,  $\text{NCH}_2\text{CH}_2\text{CH}_2\text{Me}$ ), 1.67-1.78 (m, 4H,  $\text{NCH}_2\text{CH}_2\text{CH}_2\text{Me}$ ), 1.92-2.03 (m, 4H,  $\text{NCH}_2\text{CH}_2\text{CH}_2\text{Me}$ ), 4.01-4.08 (m, 4H,  $\text{NCH}_2\text{CH}_2\text{CH}_2\text{Me}$ ), 4.60-4.68 (m, 4H,  $\text{NCH}_2\text{CH}_2\text{CH}_2\text{Me}$ ), 6.42 (d, 4H,  $^3J_{\text{H,H}} = 7.6$  Hz, *o*-protons of Ph ring), 6.77 (t, 4H,  $^3J_{\text{H,H}} = 6.8$  Hz, *m*-protons of Ph ring), 6.91 (tt, 2H,  $^3J_{\text{H,H}} = 7.5$  Hz,  $^3J_{\text{H,H}} = 1.2$  Hz *p*-protons of Ph ring).  $^{13}\text{C}\{^1\text{H}\}$  NMR (75.5 MHz,  $\text{C}_6\text{D}_6$ , 25 °C):  $\delta$  = 13.6 (s,  $\text{NCH}_2\text{CH}_2\text{CH}_2\text{Me}$ ), 20.1 (s,  $\text{NCH}_2\text{CH}_2\text{CH}_2\text{Me}$ ), 30.9 (s,  $\text{NCH}_2\text{CH}_2\text{CH}_2\text{Me}$ ), 46.7 (t,  $^3J_{\text{P,C}} = 3.8$  Hz,  $\text{NCH}_2\text{CH}_2\text{CH}_2\text{Me}$ ), 124.1 (t,  $J_{\text{P,C}} = 4.1$  Hz, *P*-C of the middle ring), 124.6 (dd,  $^3J_{\text{P,C}} = 9.5$  Hz,  $^3J_{\text{P,C}} = 7.9$  Hz, *ipso*-C of Ph ring), 128.7 (s, *Ph ring C*) 129.0 (s, *p*-C of Ph ring), 136.3 (s, *Ph ring C*), 168.9 (br, *C=S*).  $^{31}\text{P}$  NMR (121.5 MHz,  $\text{C}_6\text{D}_6$ , 25 °C):  $\delta$  = -44.6 (s). IR [ $\text{cm}^{-1}$ ]:  $\tilde{\nu}$  = 2957 (w), 2930 (w), 2871 (w), 1436 (s), 1396 (s), 1285 (s), 1216 (s), 1157 (s), 861 (s), 739 (s). Pos-ESI-MS: for  $\text{C}_{34}\text{H}_{46}\text{N}_4\text{P}_2\text{Se}_2\text{S}_2\text{H}$  theor./exp. 797.1052/797.1047. EA [%]: theor./exp. C 51.38/50.71, H 5.83/5.83, N 7.05/6.92, S 8.07/8.12.

Figure 13.  $^1\text{H}$  NMR spectrum of 3b in  $\text{CDCl}_3$  (300.1 MHz, 25 °C)

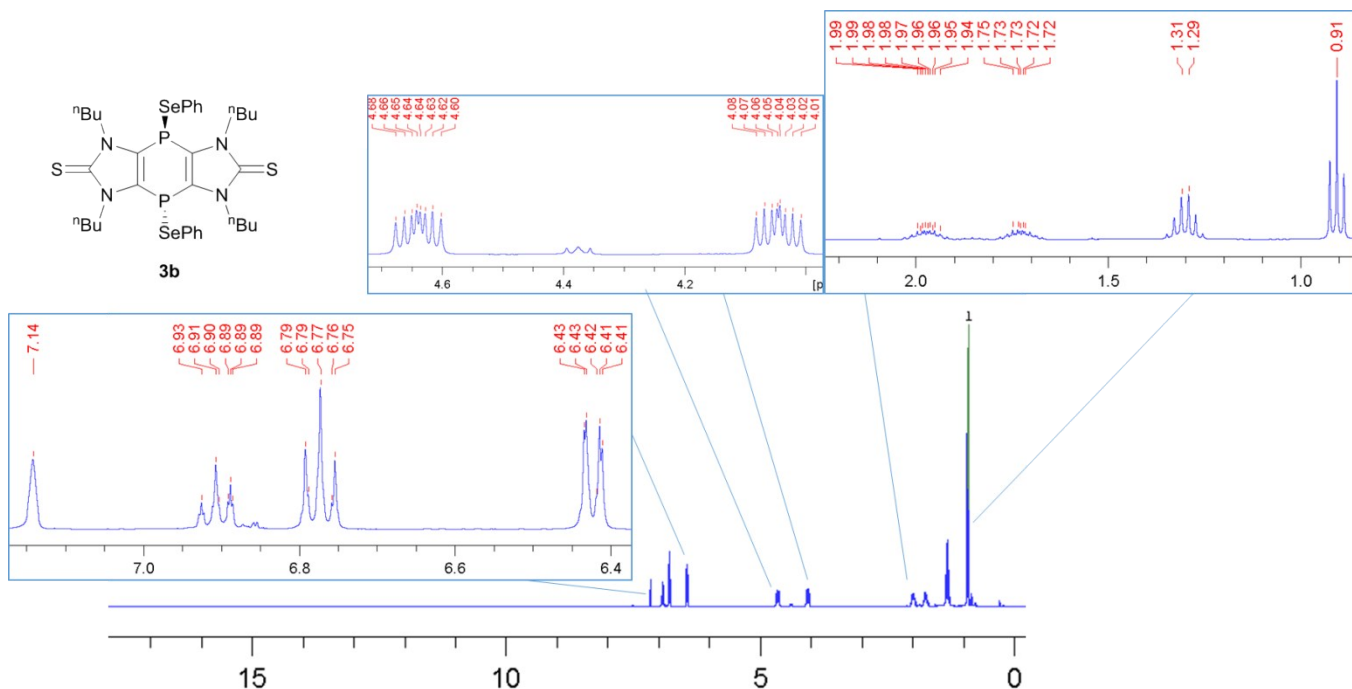

Figure 14.  $^{13}\text{C}$   $\{^1\text{H}\}$  NMR spectrum of **3b** in  $\text{CDCl}_3$  (75.5 MHz, 25 °C)

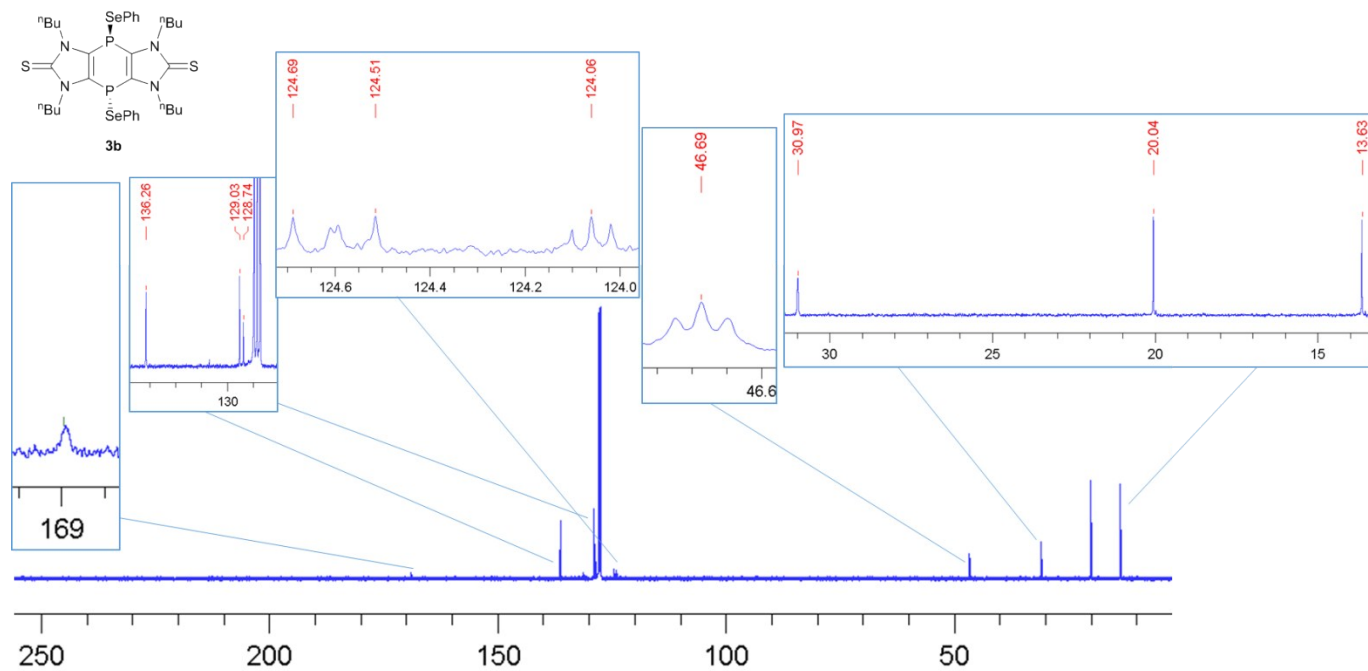

Figure 15.  $^{31}\text{P}$  NMR spectrum of **3b** in  $\text{CDCl}_3$  (121.5 MHz, 25 °C)

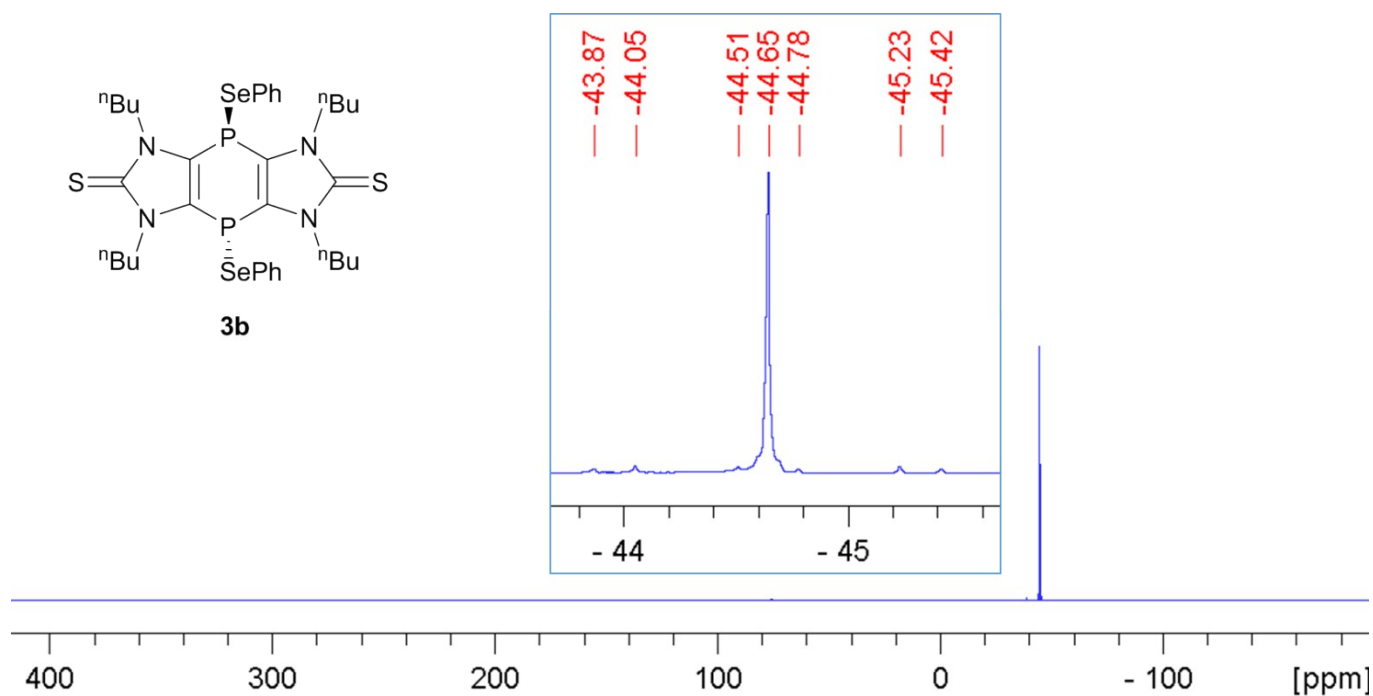

## X-ray data of the compounds

### Compound 2a

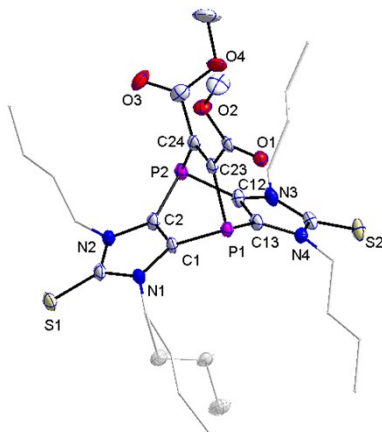

$C_{63}H_{92}N_8O_8P_4S_4$ ,  $2(C_{28}H_{42}N_4O_4P_2S_2)$ ,  $C_7H_8$ ,  $M = 1341.56$ , crystal size  $0.36 \times 0.06 \times 0.02 \text{ mm}^3$ , triclinic, space group P-1,  $Z = 2$ ,  $a = 14.6456(8) \text{ \AA}$ ,  $b = 15.5637(9) \text{ \AA}$ ,  $c = 17.4714(10) \text{ \AA}$ ,  $\alpha = 67.920(3)^\circ$ ,  $\beta = 78.389(3)^\circ$ ,  $\gamma = 73.028(3)^\circ$ .  $V = 3510.8(4) \text{ \AA}^3$ ,  $d_c = 1.269 \text{ g.cm}^{-3}$ ,  $\mu = 0.283 \text{ mm}^{-1}$ ,  $T = 100 \text{ K}$ ,  $2\theta_{\text{max}} = 51.998^\circ$ , independent reflections 23083,  $R_1[\text{for } I \geq 2\sigma(I)] = 0.0970$ ,  $wR_2(\text{for all data}) = 0.2482$ , goodness of fit 1.067,  $\Delta F(\text{max/min}) = 1.30/-0.86 \text{ e \AA}^{-3}$ .

### Compound 2b

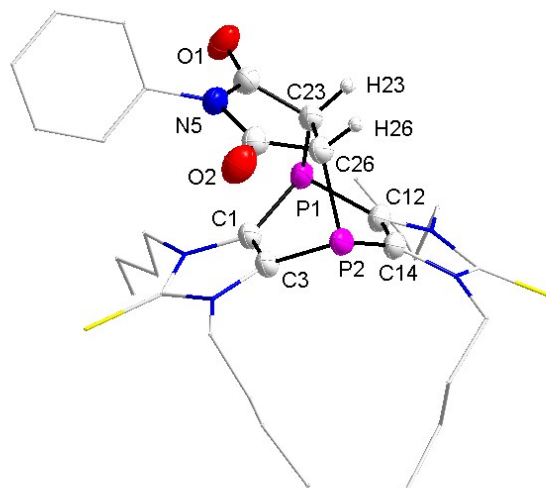

$C_{129}H_{174}Cl_2N_{20}O_8P_8S_8$ ,  $4(C_{32}H_{43}N_5O_2P_2S_2)$ ,  $CH_2Cl_2$ ,  $M = 2708.01$ , crystal size  $0.18 \times 0.12 \times 0.07 \text{ mm}^3$ , monoclinic, space group C2/c,  $Z = 2$ ,  $a = 27.7111(12) \text{ \AA}$ ,  $b = 14.5378(7) \text{ \AA}$ ,  $c = 21.9682(16) \text{ \AA}$ ,  $\alpha = 90^\circ$ ,  $\beta = 126.3663(11)^\circ$ ,  $\gamma = 90^\circ$ .  $V = 7126.5(7) \text{ \AA}^3$ ,  $d_c = 1.262 \text{ g.cm}^{-3}$ ,  $\mu = 0.313 \text{ mm}^{-1}$ ,  $T = 100 \text{ K}$ ,  $2\theta_{\text{max}} = 56^\circ$ , independent reflections 8586,  $R_{\text{int}} = 0.0533$ ,  $R_1[\text{for } I \geq 2\sigma(I)] = 0.0729$ ,  $wR_2(\text{for all data}) = 0.2277$ , goodness of fit 1.062,  $\Delta F(\text{max/min}) = 1.26/-0.51 \text{ e \AA}^{-3}$ .

## Compound 3a

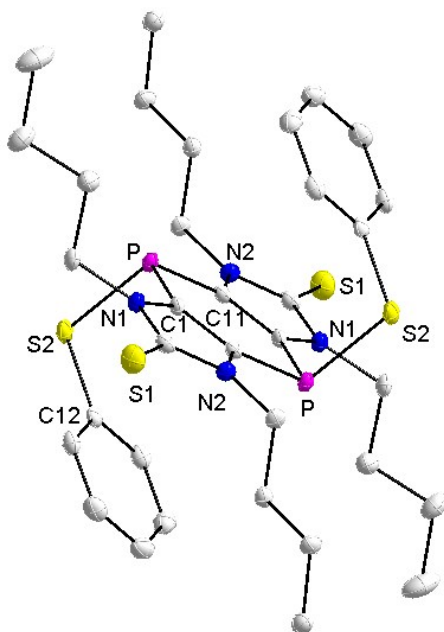

C<sub>34</sub>H<sub>46</sub>N<sub>4</sub>P<sub>2</sub>S<sub>4</sub>,  $M = 700.93$ , crystal size  $0.18 \times 0.14 \times 0.05 \text{ mm}^3$ , monoclinic, space group  $P2_1/c$ ,  $Z = 4$ ,  $a = 18.465(3) \text{ \AA}$ ,  $b = 13.1095(18) \text{ \AA}$ ,  $c = 15.633(2) \text{ \AA}$ ,  $\alpha = 90^\circ$ ,  $\beta = 103.230(5)^\circ$ ,  $\gamma = 90^\circ$ .  $V = 3683.8(9) \text{ \AA}^3$ ,  $d_c = 1.264 \text{ g.cm}^{-3}$ ,  $\mu = 0.374 \text{ mm}^{-1}$ ,  $T = 100.01 \text{ K}$ ,  $2\theta_{\text{max}} = 56^\circ$ , independent reflections 8895,  $R_{\text{int}} = 0.0776$ ,  $R_1[\text{for } I \geq 2\sigma(I)] = 0.0466$ ,  $wR_2(\text{for all data}) = 0.0975$ , goodness of fit 1.078,  $\Delta F(\text{max/min}) = 0.54/-0.40 \text{ e \AA}^{-3}$ .

## Compound 3b

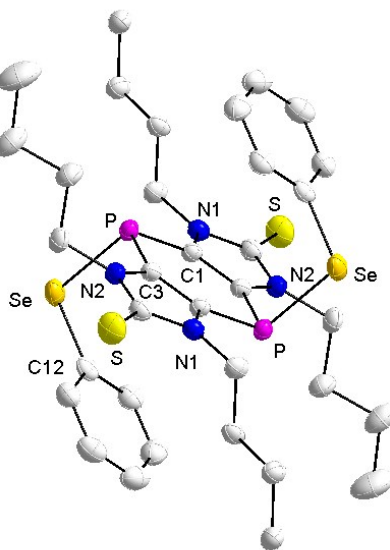

C<sub>34</sub>H<sub>46</sub>N<sub>4</sub>P<sub>2</sub>S<sub>2</sub>Se<sub>2</sub>,  $M = 794.73$ , crystal size  $0.24 \times 0.12 \times 0.08 \text{ mm}^3$ , monoclinic, space group  $P2_1/c$ ,  $Z = 4$ ,  $a = 18.5972(7) \text{ \AA}$ ,  $b = 13.2665(5) \text{ \AA}$ ,  $c = 15.6185(6) \text{ \AA}$ ,  $\alpha = 90^\circ$ ,  $\beta = 103.2796(13)^\circ$ ,  $\gamma = 90^\circ$ .  $V = 3750.4(2) \text{ \AA}^3$ ,  $d_c = 1.408 \text{ g.cm}^{-3}$ ,  $\mu = 2.197 \text{ mm}^{-1}$ ,  $T = 100 \text{ K}$ ,  $2\theta_{\text{max}} = 55.998^\circ$ , independent reflections 9047,  $R_{\text{int}} = 0.0775$ ,  $R_1[\text{for } I \geq 2\sigma(I)] = 0.0353$ ,  $wR_2(\text{for all data}) = 0.0754$ , goodness of fit 1.007,  $\Delta F(\text{max/min}) = 0.39/-0.40 \text{ e \AA}^{-3}$ .



## 4. Computation details

All calculations were carried out with the Gaussian 09 program package.<sup>[1]</sup> For H, C, N, O, P, S, Se atoms the 6-311+G\*\* basis set were used (as it was implemented in G09), while for Te the def-2-TZVP basis set<sup>[2]</sup> was used. Full geometry optimization calculations were performed, followed by calculation of the harmonic vibrational at the optimized structures to establish the nature of the stationary points obtained, as characterized by none or a single negative eigenvalue of the Hessian for minima and transition structures, respectively. The Gibbs free energies were calculated based on the harmonic vibrational frequencies (atmospheric pressure, 298.15 K). **1** and their derivatives were calculated with methyl substituents at the nitrogen atoms (instead of the *n*-butyl) to reduce the computational time and they were labeled by the special character ' . For the visualization of the molecular structures and the molecular orbitals the MOLDEN program was used.<sup>[3]</sup>

**Table 1. Reaction energies and Gibbs free energies of the [4 $\pi$ +2 $\pi$ ]-cyclo-addition reactions and the related reaction barriers in kcal.mol<sup>-1</sup> unit at M06-2X/6-311+G\*\* level of theory**

|                                | $\Delta E^\ddagger$ | $\Delta G^\ddagger$ | $\Delta E$ | $\Delta G$ |
|--------------------------------|---------------------|---------------------|------------|------------|
| C <sub>2</sub> H <sub>2</sub>  | 16,3                | 24,6                | -18,6      | -2,5       |
| C <sub>2</sub> Ph <sub>2</sub> | 18,8                | 35,9                | -13,9      | 5,4        |
| DMAD                           | 8,5                 | 25,3                | -24,6      | -4,9       |
| maleimide                      | 0,3                 | 18,2                | -21,6      | -2,3       |



Figure 16. Gibbs free energy profile of the possible formation of 3a' and 3b' compounds via 3cis intermediate at M06-2X/6-311+G\*\* level of theory and in kcal.mol<sup>-1</sup> unit

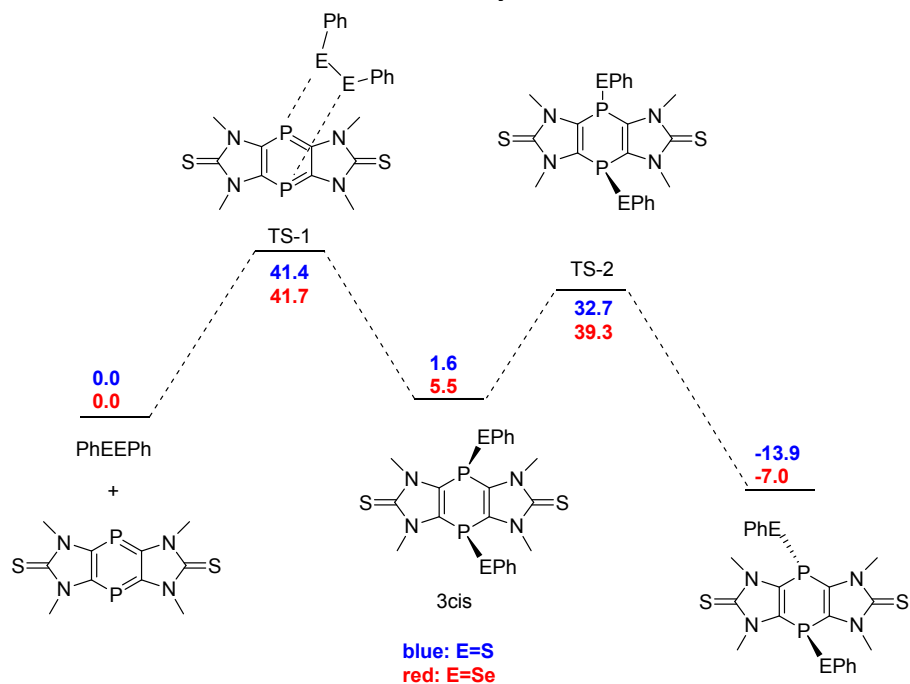

Figure 17. Gibbs free energy profile of the possible formation of 3a' and 3b' compounds via 3ipso intermediate at M06-2X/6-311+G\*\* level of theory and in kcal.mol<sup>-1</sup> unit

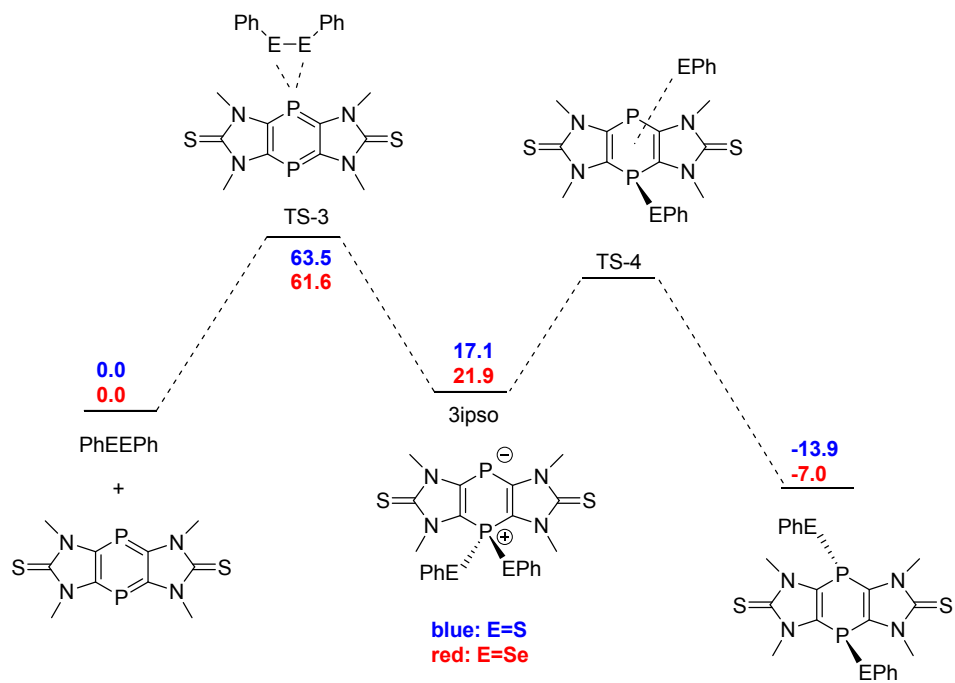

**Figure 18. The in/in, in/out and out/out rotamers of 3a'**

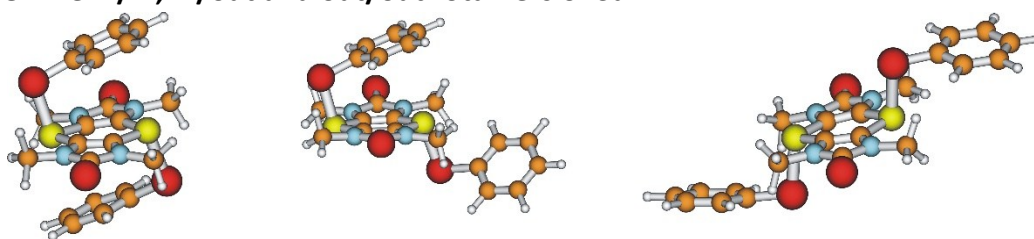

**Table 2. Relative stability of the different rotamers in case of 3a' and 3b' at M06-2X-6-311+G\*\* level of theory and in kcal/mol unit**

|      | In/in | In/out | Out/Out |
|------|-------|--------|---------|
| E=S  | 0.0   | 7.6    | 13.5    |
| E=Se | 0.0   | 5.9    | 13.8    |

**Table 3. NICS(0) and NICS(1) values of the rotamers of 3a'**

|                             | In/in   |            | In/out  |            | Out/Out |           |
|-----------------------------|---------|------------|---------|------------|---------|-----------|
|                             | NICS(0) | NICS(1)    | NICS(0) | NICS(1)    | NICS(0) | NICS(1)   |
| Ph(1)                       | 8.5     | 10.5; 11.3 | 8.5     | 10.9; 11.2 | 7.8     | 9.8; 10.5 |
| Middle ring of the tricycle | 6.1     | 7.6; 7.6   | 3.2     | 6.2; 2.1   | 0.6     | 1.0; 1.0  |
| Ph(2)                       | 8.5     | 10.5; 11.3 | 7.7     | 9.8; 10.2  | 7.8     | 9.8; 10.5 |

**Table 4. NICS(0) and NICS(1) values of the rotamers of 4a'**

|                             | In/in   |            | In/out  |             | Out/Out |          |
|-----------------------------|---------|------------|---------|-------------|---------|----------|
|                             | NICS(0) | NICS(1)    | NICS(0) | NICS(1)     | NICS(0) | NICS(1)  |
| Ph(1)                       | 8.4     | 10.5; 11.4 | 8.4     | 11.8 ; 10.6 | 7.2     | 9.7; 9.7 |
| Middle ring of the tricycle | 5.2     | 6.8; 6.8   | 3.8     | 6.3; 2.9    | 1.1     | 1.8; 1.8 |
| Ph(2)                       | 8.4     | 10.5; 11.4 | 7.1     | 9.9; 9.5    | 7.2     | 9.6; 9.7 |

**XYZ geometries and total energies of the investigated systems****C<sub>2</sub>H<sub>2</sub>**

G(M06-2X/6-311+G\*\*)= -3345.507291

E(M06-2X/6-311+G\*\*)= -77.316277

```

H  0.000000  0.000000  0.000000
C  0.000000  0.000000  1.064284
H -0.002339  0.000000  3.325454
C -0.002240  0.000000  2.261196

```

**C<sub>2</sub>Ph<sub>2</sub>**

G(M06-2X/6-311+G\*\*)= -539.204993

E(M06-2X/6-311+G\*\*)= -539.359455

```

C  0.019076  0.017367  0.119593
C  0.005502  0.025204  1.330407
C  0.035329  0.007992 -1.303597
C -0.010744  0.034592  2.753597
C -1.005109  0.608492 -2.036679
C -0.985067  0.596941 -3.426670
C  0.067697 -0.010646 -4.111243
C  1.104299 -0.608934 -3.394555
C  1.092291 -0.602025 -2.004449
H -1.822210  1.080089 -1.504154
H -1.793639  1.063627 -3.977995
H  0.080206 -0.017840 -5.195144
H  1.925280 -1.082768 -3.920876

```

|   |           |           |           |
|---|-----------|-----------|-----------|
| H | 1.896834  | -1.066390 | -1.447042 |
| C | 1.029524  | -0.566204 | 3.486679  |
| C | 1.009500  | -0.554622 | 4.876670  |
| C | -0.043068 | 0.053304  | 5.561243  |
| C | -1.079502 | 0.651884  | 4.844555  |
| C | -1.067514 | 0.644939  | 3.454449  |
| H | 1.846489  | -1.038036 | 2.954154  |
| H | 1.817947  | -1.021524 | 5.427995  |
| H | -0.055552 | 0.060540  | 6.645144  |
| H | -1.900344 | 1.125958  | 5.370876  |
| H | -1.871937 | 1.109512  | 2.897042  |

### DMAD

G(M06-2X/6-311+G\*\*)= -532.944216

E(M06-2X/6-311+G\*\*)= -533.022403

|   |           |           |           |
|---|-----------|-----------|-----------|
| C | 0.000218  | -0.000458 | -0.000245 |
| O | -0.000464 | -0.000751 | 1.432818  |
| C | 1.205557  | 0.000000  | 1.995780  |
| O | 2.246524  | -0.001169 | 1.403357  |
| C | 1.104879  | 0.002463  | 3.449617  |
| C | 1.082664  | 0.000502  | 4.648997  |
| C | 1.045999  | 0.070903  | 6.104142  |
| O | 0.965308  | 1.097099  | 6.716529  |
| O | 1.113537  | -1.144007 | 6.643470  |
| C | 1.085740  | -1.173214 | 8.075935  |
| H | -1.046290 | -0.000928 | -0.290339 |
| H | 0.506851  | 0.889318  | -0.373982 |
| H | 0.508066  | -0.889229 | -0.374645 |
| H | 1.146896  | -2.223453 | 8.345358  |
| H | 1.933521  | -0.618707 | 8.478216  |
| H | 0.158994  | -0.731198 | 8.441621  |

### Maleimide

G(M06-2X/6-311+G\*\*)= -590.290056

E(M06-2X/6-311+G\*\*)= -590.404109

|   |           |           |           |
|---|-----------|-----------|-----------|
| C | -0.003681 | 0.035398  | 0.003987  |
| C | -0.000300 | 0.000301  | 1.395937  |
| C | 1.198807  | -0.035095 | 2.102801  |
| C | 2.400572  | -0.042982 | 1.405835  |
| C | 2.408624  | -0.000295 | 0.015756  |
| C | 1.205351  | 0.042688  | -0.680300 |
| N | -1.235812 | 0.000591  | 2.103805  |
| C | -1.525201 | -0.799657 | 3.220042  |
| C | -2.931473 | -0.460413 | 3.624453  |
| C | -3.404533 | 0.463580  | 2.798392  |
| C | -2.344850 | 0.801158  | 1.788763  |
| O | -0.790065 | -1.591348 | 3.737583  |
| O | -2.419079 | 1.593079  | 0.892994  |
| H | -4.369443 | 0.948197  | 2.780925  |

|   |           |           |           |
|---|-----------|-----------|-----------|
| H | -3.404262 | -0.944049 | 4.466343  |
| H | 1.187544  | -0.067003 | 3.184099  |
| H | 3.333430  | -0.076205 | 1.955576  |
| H | 3.348409  | -0.000527 | -0.522689 |
| H | 1.202871  | 0.075679  | -1.763098 |
| H | -0.942198 | 0.067535  | -0.533137 |

### Ts(C<sub>2</sub>H<sub>2</sub>)

G(M06-2X/6-311+G\*\*)= -2163.401963  
 E(M06-2X/6-311+G\*\*)= -2163.597380

|   |           |           |           |
|---|-----------|-----------|-----------|
| C | -0.113405 | 0.294311  | 0.124436  |
| S | 0.014130  | 1.008700  | 3.207690  |
| C | 3.051270  | 0.276893  | 3.892152  |
| C | 1.217838  | 0.424943  | 2.214281  |
| N | 1.115976  | 0.131484  | 0.879109  |
| N | 2.511368  | 0.120582  | 2.554257  |
| C | 3.206269  | -0.354750 | 1.453574  |
| C | 2.321157  | -0.348526 | 0.389861  |
| C | 7.396743  | -2.361212 | 0.266972  |
| N | 6.207235  | -2.123987 | -0.529624 |
| C | 6.070770  | -2.522798 | -1.835001 |
| S | 7.178253  | -3.343634 | -2.771143 |
| H | 4.566114  | -3.359651 | -3.850238 |
| C | 4.263159  | -2.364669 | -3.527330 |
| C | 5.059969  | -1.480734 | -0.093468 |
| P | 2.728445  | -0.484446 | -1.318787 |
| N | 4.815993  | -2.116056 | -2.208226 |
| C | 4.176163  | -1.475450 | -1.158219 |
| P | 4.959559  | -0.504358 | 1.369377  |
| C | 4.978364  | 1.547033  | -0.101353 |
| C | 4.189810  | 1.552631  | -1.050590 |
| H | 4.640080  | -1.633190 | -4.244618 |
| H | 3.177528  | -2.300646 | -3.467051 |
| H | -0.062468 | -0.334826 | -0.763224 |
| H | -0.950415 | -0.005688 | 0.753273  |
| H | -0.249200 | 1.337779  | -0.166048 |
| H | 2.233446  | 0.175347  | 4.603104  |
| H | 3.798957  | -0.497710 | 4.062032  |
| H | 3.506835  | 1.262206  | 4.011974  |
| H | 7.896610  | -3.245414 | -0.124019 |
| H | 8.078452  | -1.510171 | 0.205954  |
| H | 7.099921  | -2.521465 | 1.303433  |
| H | 5.746178  | 2.000985  | 0.488508  |
| H | 3.754352  | 2.016462  | -1.910201 |

### Ts(C<sub>2</sub>Ph<sub>2</sub>)

G(M06-2X/6-311+G\*\*)= -2625.283250  
 E(M06-2X/6-311+G\*\*)= -2625.6366206

|   |          |           |          |
|---|----------|-----------|----------|
| C | 0.224718 | -2.529422 | 2.582487 |
|---|----------|-----------|----------|

|   |           |           |           |
|---|-----------|-----------|-----------|
| C | -0.687171 | -1.596192 | 2.077812  |
| C | -2.045729 | -1.723446 | 2.383005  |
| C | -2.481726 | -2.765626 | 3.192828  |
| C | -1.571601 | -3.686025 | 3.703574  |
| C | -0.218373 | -3.561094 | 3.398158  |
| C | -0.248616 | -0.500855 | 1.231052  |
| C | 0.002093  | 0.717519  | 1.141819  |
| C | 0.186036  | 1.978945  | 1.837809  |
| C | -0.909329 | 2.810656  | 2.088580  |
| C | -0.727889 | 4.020253  | 2.748222  |
| C | 0.542312  | 4.413516  | 3.159316  |
| C | 1.634171  | 3.586582  | 2.909766  |
| C | 1.462693  | 2.377402  | 2.248116  |
| P | -0.091752 | -1.825805 | -0.874178 |
| C | 1.424020  | -1.019097 | -1.277912 |
| C | 1.616589  | 0.347537  | -1.371975 |
| N | 2.982261  | 0.566720  | -1.327343 |
| C | 3.658217  | -0.623809 | -1.226884 |
| N | 2.686336  | -1.588460 | -1.183567 |
| P | 0.406617  | 1.611365  | -1.152419 |
| C | -1.007865 | 0.710848  | -1.693730 |
| C | -1.205679 | -0.652116 | -1.573867 |
| N | -2.563012 | -0.874986 | -1.727395 |
| C | -3.228629 | 0.308141  | -1.932804 |
| N | -2.255252 | 1.274789  | -1.915318 |
| C | -3.206615 | -2.172685 | -1.628848 |
| S | -4.866709 | 0.521902  | -2.162516 |
| C | -2.512035 | 2.693801  | -2.081824 |
| C | 3.611369  | 1.872296  | -1.405822 |
| S | 5.306204  | -0.876603 | -1.192178 |
| C | 2.998952  | -3.005190 | -1.113521 |
| H | -4.144751 | -2.128117 | -2.177899 |
| H | -3.407913 | -2.423820 | -0.583916 |
| H | -2.544509 | -2.923391 | -2.060807 |
| H | 2.080901  | -3.571938 | -1.258327 |
| H | 3.722470  | -3.250092 | -1.891151 |
| H | 3.439803  | -3.245191 | -0.144971 |
| H | 4.687080  | 1.718482  | -1.460451 |
| H | 3.258941  | 2.393165  | -2.297750 |
| H | 3.366871  | 2.464419  | -0.520700 |
| H | -3.453948 | 2.808047  | -2.614679 |
| H | -2.585369 | 3.186710  | -1.109545 |
| H | -1.696384 | 3.136186  | -2.653906 |
| H | -1.897892 | 2.501187  | 1.766773  |
| H | -1.583425 | 4.656356  | 2.941858  |
| H | 0.683174  | 5.356828  | 3.672859  |
| H | 2.625357  | 3.882720  | 3.234017  |
| H | 2.309926  | 1.728716  | 2.053973  |
| H | -2.749217 | -0.999620 | 1.986120  |

|   |           |           |          |
|---|-----------|-----------|----------|
| H | -3.535533 | -2.855620 | 3.428247 |
| H | -1.914219 | -4.497039 | 4.334599 |
| H | 0.495682  | -4.272931 | 3.795682 |
| H | 1.276244  | -2.431312 | 2.337282 |

**Ts(DMAD)**

G(M06-2X/6-311+G\*\*)= -2619.039318

E(M06-2X/6-311+G\*\*)= -2619.315978

|   |           |           |           |
|---|-----------|-----------|-----------|
| C | 0.024729  | 0.037649  | 0.013373  |
| C | 0.010706  | 0.015802  | 1.398331  |
| N | 1.326987  | 0.023272  | 1.813865  |
| C | 2.175879  | 0.063478  | 0.733667  |
| N | 1.353811  | 0.074362  | -0.366761 |
| P | -1.347091 | -0.376282 | 2.450005  |
| C | -2.666735 | 0.059994  | 1.369295  |
| N | -3.993435 | 0.131680  | 1.751520  |
| C | -4.817268 | 0.141025  | 0.651547  |
| N | -3.970095 | 0.074875  | -0.428986 |
| C | -2.653703 | 0.030281  | -0.014898 |
| C | -4.470334 | 0.149451  | 3.122348  |
| P | -1.302462 | -0.396393 | -1.060789 |
| C | -4.405865 | -0.021313 | -1.811206 |
| S | -6.478537 | 0.233236  | 0.637861  |
| C | 1.754855  | -0.098394 | 3.196914  |
| S | 3.839066  | 0.109977  | 0.738952  |
| C | 1.846864  | 0.078804  | -1.732159 |
| C | -1.307883 | -2.620544 | 1.331989  |
| C | -1.323408 | -2.630168 | 0.093312  |
| C | -1.391934 | -3.368753 | -1.168609 |
| O | -2.414879 | -3.686279 | -1.710308 |
| C | -1.174242 | -3.330862 | 2.605099  |
| O | -0.125244 | -3.528242 | 3.155684  |
| O | -2.365174 | -3.691981 | 3.085442  |
| C | -2.329185 | -4.364377 | 4.350388  |
| O | -0.169425 | -3.607493 | -1.650491 |
| C | -0.137344 | -4.303399 | -2.902309 |
| H | -5.456202 | 0.258481  | -1.849752 |
| H | -4.284568 | -1.046264 | -2.169632 |
| H | -3.812299 | 0.658571  | -2.423795 |
| H | 1.093579  | 0.532470  | -2.375575 |
| H | 2.768100  | 0.657738  | -1.762716 |
| H | 2.054647  | -0.940886 | -2.063268 |
| H | 2.829764  | 0.064874  | 3.226351  |
| H | 1.245133  | 0.652562  | 3.802430  |
| H | 1.522194  | -1.099567 | 3.567552  |
| H | -5.457883 | 0.606304  | 3.129658  |
| H | -4.540424 | -0.868251 | 3.513273  |
| H | -3.779129 | 0.733220  | 3.730578  |
| H | 0.915316  | -4.408191 | -3.149452 |

|   |           |           |           |
|---|-----------|-----------|-----------|
| H | -0.608691 | -5.280829 | -2.801541 |
| H | -0.661794 | -3.727247 | -3.665191 |
| H | -3.365632 | -4.579348 | 4.594383  |
| H | -1.751986 | -5.285240 | 4.271041  |
| H | -1.877304 | -3.719251 | 5.104408  |

**TS(Melimid)**

G(M06-2X/6-311+G\*\*)= -2676.396430  
E(M06-2X/6-311+G\*\*)= -2676.7107141

|   |           |           |           |
|---|-----------|-----------|-----------|
| C | -3.755012 | 0.136150  | -1.019041 |
| C | -3.117285 | -1.094936 | -0.910511 |
| C | -3.855766 | -2.259587 | -0.703254 |
| C | -5.237103 | -2.178701 | -0.589582 |
| C | -5.882233 | -0.950057 | -0.692499 |
| C | -5.138139 | 0.202521  | -0.909981 |
| N | -1.695871 | -1.174918 | -1.023662 |
| C | -0.924118 | -0.466881 | -1.959271 |
| C | 0.504255  | -0.858173 | -1.719832 |
| C | 0.524686  | -1.784028 | -0.686917 |
| C | -0.887656 | -2.020087 | -0.249499 |
| O | -1.350961 | 0.305143  | -2.775751 |
| O | -1.278324 | -2.768330 | 0.607798  |
| P | 1.238884  | 1.455375  | -1.092829 |
| C | 0.084584  | 1.374348  | 0.239274  |
| C | 0.053616  | 0.453159  | 1.272410  |
| N | -1.174075 | 0.591564  | 1.894417  |
| C | -1.897510 | 1.609853  | 1.320119  |
| N | -1.123918 | 2.045866  | 0.266599  |
| P | 1.179500  | -0.875792 | 1.558138  |
| C | 2.601092  | -0.174932 | 0.777325  |
| C | 2.622484  | 0.732277  | -0.268247 |
| N | 3.914176  | 0.735889  | -0.769034 |
| C | 4.706073  | -0.139286 | -0.068303 |
| N | 3.882346  | -0.693300 | 0.878857  |
| C | 4.397584  | 1.548489  | -1.871552 |
| C | 4.356235  | -1.653467 | 1.861590  |
| S | 6.321382  | -0.461368 | -0.299865 |
| C | -1.625672 | -0.218937 | 3.015205  |
| S | -3.364552 | 2.220026  | 1.817245  |
| C | -1.486917 | 3.114452  | -0.650415 |
| H | 4.514315  | -2.627211 | 1.395279  |
| H | 3.615864  | -1.736512 | 2.655592  |
| H | 5.305372  | -1.302358 | 2.265032  |
| H | -2.587376 | 0.172983  | 3.338197  |
| H | -1.734493 | -1.257509 | 2.696496  |
| H | -0.901915 | -0.149614 | 3.829442  |
| H | -1.510097 | 2.729201  | -1.672661 |
| H | -2.472005 | 3.475606  | -0.361607 |
| H | -0.759996 | 3.925689  | -0.576698 |



|   |           |           |           |
|---|-----------|-----------|-----------|
| H | 3.827006  | 2.476288  | -1.901897 |
| H | 5.452264  | 1.758829  | -1.703064 |
| H | 4.289463  | 1.017146  | -2.819479 |
| H | -3.351697 | -3.212284 | -0.619098 |
| H | -5.809166 | -3.082929 | -0.420564 |
| H | -6.960081 | -0.892561 | -0.600450 |
| H | -5.627262 | 1.166266  | -0.978859 |
| H | -3.180099 | 1.035536  | -1.186959 |
| H | 1.205062  | -0.822290 | -2.541414 |
| H | 1.256285  | -2.569838 | -0.563733 |

### Cycloaddition product with C<sub>2</sub>H<sub>2</sub>

G(M06-2X/6-311+G\*\*) = -2163,653148

E(M06-2X/6-311+G\*\*) = -2163.653148

|   |           |           |           |
|---|-----------|-----------|-----------|
| N | 0.002801  | 0.001335  | 0.013278  |
| C | -0.000502 | 0.006211  | 1.395859  |
| C | 1.291749  | 0.006264  | 1.804655  |
| N | 2.084212  | 0.001336  | 0.671719  |
| C | 1.293792  | 0.007076  | -0.448683 |
| P | -1.401169 | -0.084706 | 2.576111  |
| C | -0.669232 | -1.510427 | 3.559251  |
| C | 0.594672  | -1.510381 | 3.959078  |
| P | 1.758781  | -0.084590 | 3.575744  |
| C | 0.568351  | 1.211655  | 4.091255  |
| N | 0.724332  | 2.267448  | 4.970195  |
| C | -0.464336 | 2.936777  | 5.108625  |
| N | -1.357086 | 2.267353  | 4.311777  |
| C | -0.723900 | 1.211610  | 3.682456  |
| C | 1.937630  | 2.685825  | 5.648262  |
| C | -2.739650 | 2.685618  | 4.168682  |
| S | -0.760091 | 4.291115  | 6.043384  |
| C | 3.533879  | 0.025793  | 0.602641  |
| S | 1.798036  | 0.028303  | -2.042660 |
| C | -1.143387 | 0.025789  | -0.876982 |
| H | -2.776528 | 3.694155  | 3.754858  |
| H | -3.218344 | 2.697894  | 5.148120  |
| H | -3.247162 | 1.986328  | 3.506519  |
| H | -1.120742 | 0.935230  | -1.478781 |
| H | -1.099900 | -0.832156 | -1.548277 |
| H | -2.050488 | -0.007595 | -0.276077 |
| H | 3.884391  | -0.832143 | 0.028459  |
| H | 3.861463  | 0.935242  | 0.097322  |
| H | 3.930345  | -0.007603 | 1.615920  |
| H | 2.205680  | 3.694399  | 5.330954  |
| H | 1.765960  | 2.698058  | 6.724821  |
| H | 2.733703  | 1.986627  | 5.398416  |
| H | 1.014290  | -2.335056 | 4.526569  |
| H | -1.338833 | -2.335141 | 3.782174  |

**Cycloaddition product with C<sub>2</sub>Ph<sub>2</sub>**

G(M06-2X/6-311+G\*\*) = -2625.331758

E(M06-2X/6-311+G\*\*) = -2625.6887423

|   |           |           |           |
|---|-----------|-----------|-----------|
| C | 2.451759  | -0.889804 | 2.558174  |
| C | 2.290476  | 0.029772  | 1.518106  |
| C | 3.281735  | 0.992396  | 1.304595  |
| C | 4.414856  | 1.022663  | 2.107726  |
| C | 4.577157  | 0.089483  | 3.127594  |
| C | 3.593309  | -0.868801 | 3.349999  |
| C | 1.072981  | -0.011154 | 0.669550  |
| C | 1.073033  | -0.000742 | -0.669192 |
| C | 2.290080  | -0.050025 | -1.517930 |
| C | 2.457270  | 0.869425  | -2.557161 |
| C | 3.598296  | 0.841544  | -3.349382 |
| C | 4.575720  | -0.123581 | -3.128282 |
| C | 4.407495  | -1.056696 | -2.109265 |
| C | 3.274868  | -1.019608 | -1.305650 |
| P | -0.554370 | -0.040504 | 1.647925  |
| C | -1.317053 | 1.334834  | 0.712921  |
| C | -1.324235 | 1.362508  | -0.641884 |
| N | -1.866808 | 2.574416  | -1.027971 |
| C | -2.212697 | 3.303109  | 0.080677  |
| N | -1.856677 | 2.528823  | 1.154659  |
| P | -0.553900 | 0.043156  | -1.647622 |
| C | -1.329319 | -1.325021 | -0.712678 |
| C | -1.336877 | -1.352643 | 0.642164  |
| N | -1.891003 | -2.559354 | 1.028142  |
| C | -2.243641 | -3.284697 | -0.080593 |
| N | -1.880250 | -2.513788 | -1.154518 |
| C | -2.133879 | -3.030737 | 2.379198  |
| C | -2.102373 | -2.932722 | -2.526435 |
| S | -2.973009 | -4.789119 | -0.114825 |
| C | -2.104721 | 3.048145  | -2.379084 |
| S | -2.927709 | 4.814428  | 0.114584  |
| C | -2.074813 | 2.949911  | 2.526545  |
| H | -3.142504 | 3.086224  | 2.703386  |
| H | -1.573078 | 3.902705  | 2.696313  |
| H | -1.674375 | 2.186759  | 3.191485  |
| H | -3.205254 | -3.164744 | 2.534518  |
| H | -1.643397 | -3.994009 | 2.521678  |
| H | -1.740054 | -2.295235 | 3.078878  |
| H | -1.609245 | -3.889975 | -2.696375 |
| H | -3.171282 | -3.059434 | -2.703080 |
| H | -1.695242 | -2.173107 | -3.191363 |
| H | -3.174680 | 3.192584  | -2.534706 |
| H | -1.604817 | 4.006577  | -2.521397 |
| H | -1.717856 | 2.308852  | -3.078655 |
| H | 1.693726  | 1.619942  | -2.737758 |
| H | 3.721636  | 1.569869  | -4.142004 |

|   |          |           |           |
|---|----------|-----------|-----------|
| H | 5.461631 | -0.152109 | -3.751352 |
| H | 5.160899 | -1.816769 | -1.939548 |
| H | 3.146310 | -1.742141 | -0.507814 |
| H | 3.157742 | 1.715060  | 0.506163  |
| H | 5.173241 | 1.777536  | 1.937015  |
| H | 5.463447 | 0.112729  | 3.750352  |
| H | 3.712045 | -1.597119 | 4.143334  |
| H | 1.683224 | -1.634942 | 2.739787  |

### Cycloaddition product with DMAD

G(M06-2X/6-311+G\*\*) = -2619.087438

E(M06-2X/6-311+G\*\*) = -2619.368830

|   |           |           |           |
|---|-----------|-----------|-----------|
| N | 0.109501  | 0.054894  | -0.037550 |
| C | 0.098150  | 0.040630  | 1.343691  |
| C | 1.386739  | 0.114492  | 1.758877  |
| N | 2.184841  | 0.170150  | 0.632975  |
| C | 1.401748  | 0.142626  | -0.492493 |
| P | -1.306600 | -0.183511 | 2.497991  |
| C | -0.478683 | -1.612142 | 3.428038  |
| C | -1.256515 | -2.868332 | 3.667575  |
| O | -0.789742 | -3.885177 | 4.105941  |
| P | 1.851031  | 0.012615  | 3.523406  |
| C | 0.783349  | -1.522813 | 3.841332  |
| C | 1.537914  | -2.643528 | 4.495203  |
| O | 2.353873  | -3.293362 | 3.905000  |
| C | 3.633529  | 0.252056  | 0.575039  |
| S | 1.910172  | 0.209168  | -2.081270 |
| C | -1.030781 | 0.007860  | -0.935031 |
| C | 0.561050  | 1.173764  | 4.094609  |
| N | 0.623607  | 2.165761  | 5.055244  |
| C | -0.619061 | 2.716719  | 5.235303  |
| N | -1.449282 | 2.035764  | 4.380491  |
| C | -0.726363 | 1.092139  | 3.676863  |
| C | 1.793467  | 2.626793  | 5.781210  |
| C | -2.865895 | 2.333858  | 4.268191  |
| S | -1.033297 | 3.962301  | 6.266983  |
| O | 1.254343  | -2.744074 | 5.788465  |
| C | 1.866240  | -3.855510 | 6.455505  |
| O | -2.541484 | -2.726789 | 3.329765  |
| C | -3.357725 | -3.886563 | 3.526247  |
| H | -2.996244 | 3.377952  | 3.982179  |
| H | -3.348657 | 2.177155  | 5.233279  |
| H | -3.300283 | 1.677000  | 3.516647  |
| H | -1.020970 | 0.887084  | -1.579864 |
| H | -0.965933 | -0.881724 | -1.562317 |
| H | -1.940875 | -0.016078 | -0.338224 |
| H | 4.023874  | -0.607978 | 0.030528  |
| H | 3.926620  | 1.160326  | 0.047619  |
| H | 4.021328  | 0.259882  | 1.592106  |

|   |           |           |          |
|---|-----------|-----------|----------|
| H | 1.952473  | 3.686897  | 5.581263 |
| H | 1.632044  | 2.496919  | 6.851752 |
| H | 2.655174  | 2.046403  | 5.455972 |
| H | -4.349839 | -3.608346 | 3.182397 |
| H | -2.964727 | -4.722021 | 2.947005 |
| H | -3.374340 | -4.157692 | 4.581860 |
| H | 1.559480  | -3.778338 | 7.494523 |
| H | 1.504587  | -4.783336 | 6.011515 |
| H | 2.950802  | -3.802245 | 6.363734 |

### Cycloaddition product with Melaimid

G(M06-2X/6-311+G\*\*) = -2676.429095

E(M06-2X/6-311+G\*\*) = -2676.7456706

|   |           |           |           |
|---|-----------|-----------|-----------|
| C | 4.111448  | -2.443869 | -0.322312 |
| C | 3.330979  | -1.310700 | -0.515681 |
| C | 3.895755  | -0.042189 | -0.554037 |
| C | 5.269015  | 0.093105  | -0.395124 |
| C | 6.062809  | -1.032627 | -0.201975 |
| C | 5.483955  | -2.297823 | -0.164743 |
| N | 1.911398  | -1.445316 | -0.639142 |
| C | 1.121440  | -2.049533 | 0.339510  |
| C | -0.336996 | -1.816057 | -0.016935 |
| C | -0.311787 | -1.159504 | -1.398609 |
| C | 1.164359  | -0.900733 | -1.681260 |
| P | -1.036606 | -0.796775 | 1.449848  |
| C | -0.120868 | 0.710104  | 0.970100  |
| C | -0.194930 | 1.269550  | -0.270477 |
| N | 0.831984  | 2.189478  | -0.368439 |
| C | 1.543493  | 2.225452  | 0.803827  |
| N | 0.955255  | 1.292387  | 1.617502  |
| P | -1.161114 | 0.539918  | -1.639808 |
| C | -2.636116 | 0.150199  | -0.653315 |
| N | -3.971060 | 0.250850  | -1.003068 |
| C | -4.758702 | -0.202485 | 0.023863  |
| N | -3.887744 | -0.591563 | 1.009592  |
| C | -2.585155 | -0.372502 | 0.599961  |
| C | -4.528274 | 0.776696  | -2.237009 |
| C | -4.340661 | -1.118855 | 2.285109  |
| S | -6.425932 | -0.264607 | 0.068554  |
| C | 1.450374  | 0.997862  | 2.952800  |
| S | 2.852895  | 3.200439  | 1.158488  |
| C | 1.164685  | 3.015632  | -1.517743 |
| O | 1.535465  | -2.600896 | 1.321093  |
| O | 1.612575  | -0.293648 | -2.614778 |
| H | -5.169024 | 1.629860  | -2.012074 |
| H | -5.132604 | 0.008748  | -2.720581 |
| H | -3.709340 | 1.079517  | -2.887041 |
| H | 1.188650  | 4.062413  | -1.214556 |
| H | 2.147306  | 2.735303  | -1.900187 |

|   |           |           |           |
|---|-----------|-----------|-----------|
| H | 0.412900  | 2.854352  | -2.287855 |
| H | 2.475287  | 0.631147  | 2.884299  |
| H | 1.441638  | 1.907839  | 3.553179  |
| H | 0.811551  | 0.238443  | 3.399988  |
| H | -4.966037 | -0.378017 | 2.784182  |
| H | -4.936072 | -2.016604 | 2.116732  |
| H | -3.469346 | -1.351469 | 2.894786  |
| H | 3.644245  | -3.419598 | -0.278780 |
| H | 6.100475  | -3.174374 | -0.007633 |
| H | 7.133148  | -0.924114 | -0.073917 |
| H | 5.707846  | 1.083083  | -0.409584 |
| H | 3.269989  | 0.830071  | -0.696142 |
| H | -0.875994 | -2.763685 | 0.002192  |
| H | -0.712325 | -1.818219 | -2.171624 |

1

|                     |                |           |           |
|---------------------|----------------|-----------|-----------|
| G(M06-2X/6-311+G**) | = -3345.507291 |           |           |
| E(M06-2X/6-311+G**) | = -2086.307153 |           |           |
| C                   | -0.006619      | -0.033098 | 0.010543  |
| C                   | -0.007378      | -0.037494 | 1.417912  |
| N                   | 1.321641       | -0.098231 | 1.804817  |
| C                   | 2.156959       | -0.130475 | 0.715113  |
| N                   | 1.322932       | -0.089339 | -0.375274 |
| P                   | -1.323281      | 0.019501  | 2.561684  |
| C                   | -2.638147      | 0.078111  | 1.416796  |
| C                   | -2.637392      | 0.082603  | 0.009437  |
| N                   | -3.966428      | 0.143236  | -0.377465 |
| C                   | -4.801739      | 0.175355  | 0.712259  |
| N                   | -3.967705      | 0.134161  | 1.802633  |
| P                   | -1.321484      | 0.025456  | -1.134344 |
| C                   | -4.408728      | 0.151570  | 3.183601  |
| S                   | -6.462691      | 0.248226  | 0.711639  |
| C                   | -4.406159      | 0.164800  | -1.758803 |
| C                   | 1.761376       | -0.119161 | 3.186150  |
| S                   | 3.817888       | -0.203570 | 0.715790  |
| C                   | 1.763997       | -0.106310 | -1.756233 |
| H                   | 1.312654       | -0.970719 | 3.702110  |
| H                   | 2.844831       | -0.211020 | 3.190320  |
| H                   | 1.465116       | 0.806225  | 3.685092  |
| H                   | 2.851339       | -0.109243 | -1.759456 |
| H                   | 1.388684       | -1.002155 | -2.255885 |
| H                   | 1.391620       | 0.781320  | -2.272143 |
| H                   | -4.038590      | -0.737143 | 3.699258  |
| H                   | -5.496063      | 0.157036  | 3.186795  |
| H                   | -4.031306      | 1.046377  | 3.683509  |
| H                   | -4.106492      | -0.758731 | -2.259101 |
| H                   | -3.960741      | 1.018849  | -2.273507 |
| H                   | -5.489939      | 0.252671  | -1.762794 |

**PhSSPh**

G(M06-2X/6-311+G\*\*)= -1259.437823

E(M06-2X/6-311+G\*\*)= -1259.582652

|   |           |           |           |
|---|-----------|-----------|-----------|
| S | -0.357761 | -0.687690 | -0.010907 |
| S | -0.416676 | -0.653675 | 2.040907  |
| C | 1.302867  | -0.166075 | -0.431884 |
| C | -0.795259 | 1.045279  | 2.461884  |
| C | 1.685517  | -0.388052 | -1.755794 |
| C | 2.937483  | 0.025906  | -2.191807 |
| C | 3.816690  | 0.649860  | -1.311840 |
| C | 3.432316  | 0.858517  | 0.007333  |
| C | 2.177009  | 0.456118  | 0.453497  |
| H | 1.007462  | -0.885751 | -2.440739 |
| H | 3.228381  | -0.149708 | -3.220683 |
| H | 4.794644  | 0.967674  | -1.651830 |
| H | 4.109911  | 1.341672  | 0.701370  |
| H | 1.887736  | 0.620575  | 1.484261  |
| C | -1.178821 | 1.265674  | 3.785794  |
| C | -1.446306 | 2.556888  | 4.221807  |
| C | -1.345550 | 3.630281  | 3.341840  |
| C | -0.972660 | 3.401732  | 2.022667  |
| C | -0.693495 | 2.113404  | 1.576503  |
| H | -1.270814 | 0.429612  | 4.470739  |
| H | -1.743841 | 2.721006  | 5.250683  |
| H | -1.559291 | 4.636120  | 3.681830  |
| H | -0.893033 | 4.230123  | 1.328630  |
| H | -0.406434 | 1.945115  | 0.545739  |

**Ts\_1 E=S**

G(M06-2X/6-311+G\*\*)= -3345.507291

E(M06-2X/6-311+G\*\*)= -3345.8483611

|   |           |           |           |
|---|-----------|-----------|-----------|
| N | -3.153845 | -1.322185 | -0.863215 |
| C | -1.767360 | -1.336718 | -0.932212 |
| C | -1.332806 | -2.250179 | 0.032455  |
| N | -2.475357 | -2.744275 | 0.639488  |
| C | -3.607845 | -2.191763 | 0.095943  |
| P | -0.868238 | -0.244270 | -1.966027 |
| C | 0.735466  | -0.855153 | -1.611809 |
| C | 1.181527  | -1.753326 | -0.635779 |
| N | 2.562998  | -1.772435 | -0.729516 |
| C | 3.005999  | -0.927038 | -1.714206 |
| N | 1.871350  | -0.380355 | -2.254428 |
| P | 0.285409  | -2.568851 | 0.635958  |
| C | 1.852344  | 0.606195  | -3.318445 |
| S | 4.589484  | -0.613735 | -2.146023 |
| C | 3.431720  | -2.475432 | 0.196700  |
| C | -2.464026 | -3.701685 | 1.727834  |
| S | -5.193285 | -2.519209 | 0.499681  |
| C | -3.998075 | -0.479478 | -1.684434 |

|   |           |           |           |
|---|-----------|-----------|-----------|
| S | 0.001982  | 0.031033  | 1.696776  |
| C | 1.726401  | 0.347728  | 1.974879  |
| C | 2.305818  | 0.031009  | 3.210361  |
| C | 3.675799  | 0.195187  | 3.394430  |
| C | 4.466752  | 0.699339  | 2.364447  |
| C | 3.889625  | 1.025862  | 1.138810  |
| C | 2.526908  | 0.841968  | 0.940630  |
| S | -0.825229 | 1.676923  | 0.113338  |
| C | -1.281253 | 3.399108  | 0.192983  |
| C | -2.621266 | 3.766572  | 0.367229  |
| C | -2.982957 | 5.108643  | 0.345350  |
| C | -2.010392 | 6.087561  | 0.153186  |
| C | -0.678322 | 5.729542  | -0.040651 |
| C | -0.313089 | 4.388526  | -0.029225 |
| H | 2.870835  | 0.730333  | -3.678339 |
| H | 1.476649  | 1.559146  | -2.931910 |
| H | 1.204962  | 0.263782  | -4.127488 |
| H | -5.032320 | -0.695590 | -1.428114 |
| H | -3.774480 | 0.573001  | -1.484102 |
| H | -3.822898 | -0.695260 | -2.740504 |
| H | -2.033026 | -3.244857 | 2.622877  |
| H | -3.492953 | -3.995855 | 1.926425  |
| H | -1.873149 | -4.572435 | 1.443177  |
| H | 4.430433  | -2.501944 | -0.233086 |
| H | 3.455734  | -1.948925 | 1.154441  |
| H | 3.054419  | -3.488425 | 0.339856  |
| H | 1.681252  | -0.336138 | 4.014903  |
| H | 4.122458  | -0.056096 | 4.348911  |
| H | 5.530621  | 0.837323  | 2.515094  |
| H | 4.500634  | 1.397186  | 0.325331  |
| H | 2.070271  | 1.092050  | -0.011200 |
| H | 0.718092  | 4.093161  | -0.174465 |
| H | 0.073300  | 6.493787  | -0.196631 |
| H | -2.293898 | 7.135176  | 0.152835  |
| H | -4.019623 | 5.392054  | 0.487016  |
| H | -3.364514 | 2.994964  | 0.531028  |

### Ts\_3 E=S

G(M06-2X/6-311+G\*\*)= -3345.472092

E(M06-2X/6-311+G\*\*)= -3345.815599

|   |           |           |           |
|---|-----------|-----------|-----------|
| C | -4.594581 | -3.199708 | -0.497397 |
| C | -3.995648 | -1.928156 | -0.621189 |
| C | -4.836288 | -0.797494 | -0.721040 |
| C | -6.214614 | -0.934948 | -0.692604 |
| C | -6.788034 | -2.200329 | -0.566271 |
| C | -5.973881 | -3.330268 | -0.473409 |
| S | -2.272590 | -1.736192 | -0.633091 |
| S | -0.472610 | -0.838941 | 1.532464  |
| C | -1.279410 | 0.707476  | 1.738983  |

|   |           |           |           |
|---|-----------|-----------|-----------|
| C | -2.678527 | 0.758725  | 1.788741  |
| C | -3.320194 | 1.970929  | 1.989703  |
| C | -2.574805 | 3.142580  | 2.125467  |
| C | -1.183013 | 3.096049  | 2.088458  |
| C | -0.532956 | 1.882092  | 1.902917  |
| P | 0.555958  | -0.594370 | -0.722504 |
| C | 2.148578  | -1.223819 | -0.340356 |
| C | 3.364281  | -0.568406 | -0.152332 |
| N | 4.295342  | -1.562072 | 0.104733  |
| C | 3.709511  | -2.805173 | 0.107114  |
| N | 2.383213  | -2.573605 | -0.163576 |
| P | 3.754875  | 1.141240  | -0.126324 |
| C | 2.162555  | 1.758516  | -0.539910 |
| N | 1.912701  | 3.116390  | -0.663977 |
| C | 0.594763  | 3.351242  | -0.969254 |
| N | 0.015466  | 2.114008  | -1.052934 |
| C | 0.940128  | 1.119054  | -0.782368 |
| C | 2.921206  | 4.146480  | -0.510975 |
| C | -1.402928 | 1.943255  | -1.330546 |
| S | -0.168369 | 4.816089  | -1.178828 |
| C | 1.358071  | -3.599749 | -0.253621 |
| S | 4.445042  | -4.274023 | 0.371882  |
| C | 5.701438  | -1.310229 | 0.355184  |
| H | -1.629122 | 2.370002  | -2.308659 |
| H | 3.365056  | 4.086641  | 0.485428  |
| H | -1.649113 | 0.881820  | -1.311497 |
| H | -1.981068 | 2.471321  | -0.569363 |
| H | 0.848116  | -3.523389 | -1.215232 |
| H | 1.847948  | -4.567570 | -0.162412 |
| H | 0.629496  | -3.478119 | 0.551485  |
| H | 6.198933  | -2.271617 | 0.460202  |
| H | 6.130044  | -0.755861 | -0.482686 |
| H | 5.818928  | -0.731198 | 1.274011  |
| H | 2.435612  | 5.110713  | -0.644488 |
| H | 3.702545  | 4.015987  | -1.263711 |
| H | 0.551145  | 1.833580  | 1.872602  |
| H | -0.606620 | 4.008439  | 2.181481  |
| H | -3.077618 | 4.093017  | 2.253336  |
| H | -4.402964 | 2.006638  | 2.026746  |
| H | -3.245321 | -0.155845 | 1.657629  |
| H | -3.954103 | -4.069919 | -0.425310 |
| H | -6.421066 | -4.312412 | -0.379761 |
| H | -7.865998 | -2.306794 | -0.544581 |
| H | -6.847932 | -0.058660 | -0.770849 |
| H | -4.380050 | 0.181327  | -0.824684 |

### 3cis E=S

G(M06-2X/6-311+G\*\*)= -3345.570737

E(M06-2X/6-311+G\*\*)= -3345.921440



|   |           |           |           |
|---|-----------|-----------|-----------|
| C | -0.953850 | 1.199265  | -1.075084 |
| C | -1.506827 | -0.048313 | -1.133703 |
| N | -2.874906 | 0.125365  | -1.293267 |
| C | -3.191223 | 1.456930  | -1.288998 |
| N | -1.990929 | 2.109203  | -1.180446 |
| P | -0.776941 | -1.691353 | -0.894969 |
| C | 0.954019  | -1.188070 | -1.064698 |
| C | 1.509576  | 0.056876  | -1.136608 |
| N | 2.877684  | -0.122092 | -1.301497 |
| C | 3.191324  | -1.451020 | -1.289730 |
| N | 1.991029  | -2.100648 | -1.167943 |
| P | 0.779731  | 1.705100  | -0.920818 |
| S | 0.763357  | 1.891254  | 1.269413  |
| C | 2.495366  | 1.589114  | 1.585744  |
| C | 2.930364  | 0.274079  | 1.762315  |
| C | 4.271137  | 0.018112  | 2.022970  |
| C | 5.175035  | 1.073535  | 2.126024  |
| C | 4.738181  | 2.384305  | 1.961818  |
| C | 3.399969  | 2.646240  | 1.688708  |
| C | 3.897717  | 0.905940  | -1.443679 |
| S | 4.710466  | -2.140152 | -1.386156 |
| C | 1.897921  | -3.550457 | -1.110592 |
| C | -3.892321 | -0.902605 | -1.435686 |
| S | -4.710373 | 2.140757  | -1.385317 |
| C | -1.900573 | 3.559052  | -1.137213 |
| S | -0.747654 | -1.826265 | 1.295214  |
| C | -2.492872 | -1.584753 | 1.600965  |
| C | -2.969922 | -0.285590 | 1.780957  |
| C | -4.323893 | -0.071782 | 2.028410  |
| C | -5.193665 | -1.156148 | 2.117498  |
| C | -4.712123 | -2.453706 | 1.947243  |
| C | -3.363370 | -2.670811 | 1.684701  |
| H | 4.523261  | 0.928530  | -0.550174 |
| H | 3.414950  | 1.870023  | -1.585597 |
| H | 4.517651  | 0.664227  | -2.306389 |
| H | -0.851564 | 3.849153  | -1.213941 |
| H | -2.470365 | 3.978410  | -1.965823 |
| H | -2.321275 | 3.928746  | -0.201075 |
| H | -4.523609 | -0.927418 | -0.545140 |
| H | -4.511789 | -0.663810 | -2.301456 |
| H | -3.406984 | -1.866816 | -1.576925 |
| H | 2.461560  | -3.978255 | -1.940347 |
| H | 2.324515  | -3.914264 | -0.175933 |
| H | 0.849082  | -3.840622 | -1.178863 |
| H | 2.210759  | -0.535963 | 1.685515  |
| H | 4.613136  | -1.004316 | 2.128635  |
| H | 6.218606  | 0.871982  | 2.327963  |
| H | 5.440993  | 3.205848  | 2.045996  |
| H | 3.047461  | 3.665043  | 1.556579  |

|   |           |           |          |
|---|-----------|-----------|----------|
| H | -2.276605 | 0.548175  | 1.712622 |
| H | -4.697385 | 0.937443  | 2.139968 |
| H | -6.245147 | -0.988870 | 2.311520 |
| H | -5.391322 | -3.296315 | 2.014903 |
| H | -2.976690 | -3.676404 | 1.552045 |

### TS\_2 E=S

G(M06-2X/6-311+G\*\*)= -3345.521050

E(M06-2X/6-311+G\*\*)= -3345.8639389

|   |           |           |           |
|---|-----------|-----------|-----------|
| N | -2.202915 | -1.024032 | 1.397507  |
| C | -1.305003 | -0.134229 | 0.803447  |
| C | -0.308371 | -0.909446 | 0.273036  |
| N | -0.604813 | -2.227578 | 0.531715  |
| C | -1.806605 | -2.312089 | 1.208759  |
| P | -1.639631 | 1.629529  | 0.585590  |
| C | 0.078452  | 2.167754  | 0.391185  |
| C | 1.154615  | 1.478037  | -0.102703 |
| N | 2.250249  | 2.312022  | -0.078193 |
| C | 1.883257  | 3.547347  | 0.412282  |
| N | 0.558372  | 3.440389  | 0.707866  |
| P | 1.086039  | -0.223880 | -0.551041 |
| S | 2.357576  | -1.193584 | -1.769805 |
| C | 3.699374  | -1.852217 | -0.741816 |
| C | 4.706968  | -2.501907 | -1.450678 |
| C | 5.782049  | -3.050854 | -0.761401 |
| C | 5.851022  | -2.951624 | 0.624513  |
| C | 4.838926  | -2.300749 | 1.321285  |
| C | 3.757220  | -1.748790 | 0.641305  |
| C | 3.596251  | 1.960347  | -0.494970 |
| S | 2.849168  | 4.896430  | 0.615120  |
| C | -0.204754 | 4.550605  | 1.251326  |
| C | 0.213520  | -3.369630 | 0.161397  |
| S | -2.590731 | -3.718668 | 1.670826  |
| C | -3.436028 | -0.632078 | 2.058662  |
| S | -2.199796 | 1.652946  | -1.548760 |
| C | -3.633534 | 0.603166  | -1.341886 |
| C | -4.884996 | 1.152959  | -1.060637 |
| C | -5.976238 | 0.316554  | -0.846790 |
| C | -5.819704 | -1.065882 | -0.898402 |
| C | -4.572634 | -1.615989 | -1.182333 |
| C | -3.483414 | -0.783304 | -1.415303 |
| H | 4.261397  | 2.746191  | -0.142444 |
| H | 3.654557  | 1.892140  | -1.582537 |
| H | 3.877412  | 1.003935  | -0.049309 |
| H | 1.257876  | -3.157317 | 0.398127  |
| H | -0.135291 | -4.224046 | 0.737613  |
| H | 0.114221  | -3.583369 | -0.904269 |
| H | -3.876628 | -1.529528 | 2.487149  |
| H | -3.213848 | 0.089964  | 2.845235  |

|   |           |           |           |
|---|-----------|-----------|-----------|
| H | -4.127103 | -0.191975 | 1.336105  |
| H | -1.231161 | 4.225757  | 1.410744  |
| H | 0.240470  | 4.870980  | 2.193491  |
| H | -0.177434 | 5.386914  | 0.552155  |
| H | 4.654182  | -2.577586 | -2.531762 |
| H | 6.567201  | -3.555838 | -1.311279 |
| H | 6.690124  | -3.380042 | 1.158500  |
| H | 4.885772  | -2.219444 | 2.400690  |
| H | 2.968559  | -1.237759 | 1.185299  |
| H | -2.506539 | -1.201141 | -1.635464 |
| H | -4.440058 | -2.691216 | -1.204654 |
| H | -6.667146 | -1.715233 | -0.713921 |
| H | -6.947442 | 0.746565  | -0.631757 |
| H | -4.993206 | 2.229839  | -1.007984 |

### 3a'

G(M06-2X/6-311+G\*\*)= -3345,596157

E(M06-2X/6-311+G\*\*)= -3345.940991

|   |           |           |           |
|---|-----------|-----------|-----------|
| C | -0.705686 | 3.095166  | -0.046556 |
| C | -1.531983 | 2.440952  | 0.868074  |
| C | -2.847478 | 2.124220  | 0.520801  |
| C | -3.322191 | 2.427825  | -0.749161 |
| C | -2.490053 | 3.058926  | -1.671245 |
| C | -1.189138 | 3.403187  | -1.314912 |
| S | -0.887373 | 1.905800  | 2.440929  |
| P | 0.024717  | -0.008024 | 1.883004  |
| C | 1.253527  | 0.501177  | 0.664706  |
| N | 2.523950  | 0.895514  | 1.059511  |
| C | 3.306831  | 1.153000  | -0.031430 |
| N | 2.480406  | 0.974635  | -1.110487 |
| C | 1.225192  | 0.557926  | -0.699309 |
| C | 2.989376  | 0.941224  | 2.434815  |
| S | 4.928399  | 1.560736  | -0.076172 |
| C | 2.940030  | 1.124062  | -2.481375 |
| P | -0.024755 | 0.008509  | -1.882876 |
| S | 0.887217  | -1.905401 | -2.441120 |
| C | 1.531743  | -2.440769 | -0.868315 |
| C | 0.705306  | -3.094821 | 0.046295  |
| C | 1.188694  | -3.402964 | 1.314641  |
| C | 2.489676  | -3.058975 | 1.670987  |
| C | 3.321959  | -2.428045 | 0.748909  |
| C | 2.847323  | -2.124341 | -0.521056 |
| C | -1.225109 | -0.557666 | 0.699453  |
| N | -2.480216 | -0.974643 | 1.110703  |
| C | -3.306612 | -1.153299 | 0.031662  |
| N | -2.523742 | -0.895892 | -1.059294 |
| C | -1.253407 | -0.501190 | -0.664566 |
| C | -2.939481 | -1.123970 | 2.481725  |
| C | -2.989259 | -0.941828 | -2.434568 |

|   |           |           |           |
|---|-----------|-----------|-----------|
| S | -4.928149 | -1.561237 | 0.076173  |
| H | 3.573130  | 2.008162  | -2.538822 |
| H | 2.075782  | 1.233475  | -3.135434 |
| H | 3.521191  | 0.250787  | -2.785030 |
| H | -2.341363 | -1.594587 | -3.022030 |
| H | -4.002963 | -1.336703 | -2.424285 |
| H | -2.986757 | 0.064946  | -2.858141 |
| H | -3.575421 | -2.006051 | 2.538469  |
| H | -2.075146 | -1.237032 | 3.135086  |
| H | -3.517471 | -0.249093 | 2.786872  |
| H | 4.004688  | 1.331946  | 2.424201  |
| H | 2.344153  | 1.597327  | 3.021526  |
| H | 2.982602  | -0.065042 | 2.859522  |
| H | -0.310703 | -3.347961 | -0.234756 |
| H | 0.544371  | -3.906269 | 2.026169  |
| H | 2.858091  | -3.293214 | 2.663030  |
| H | 4.338725  | -2.160837 | 1.014588  |
| H | 3.490975  | -1.624816 | -1.236430 |
| H | -3.491051 | 1.624590  | 1.236171  |
| H | -4.338907 | 2.160416  | -1.014837 |
| H | -2.858513 | 3.293044  | -2.663298 |
| H | -0.544938 | 3.906628  | -2.026453 |
| H | 0.310252  | 3.348558  | 0.234517  |

### 3a'

G(B3LYP/6-311+G\*\*)= -3346.205744

E(B3LYP/6-311+G\*\*)= -3346.536604

|   |           |           |           |
|---|-----------|-----------|-----------|
| N | -2.694659 | 0.116686  | 1.086913  |
| C | -1.362818 | 0.075228  | 0.681571  |
| C | -1.362825 | -0.075256 | -0.681178 |
| N | -2.694667 | -0.117085 | -1.086465 |
| C | -3.535220 | -0.000388 | 0.000251  |
| P | 0.000159  | 0.229874  | 1.864141  |
| C | 1.363161  | 0.075539  | 0.681562  |
| N | 2.694992  | 0.117116  | 1.086926  |
| C | 3.535575  | 0.000029  | 0.000283  |
| N | 2.695056  | -0.116649 | -1.086449 |
| C | 1.363198  | -0.074986 | -0.681191 |
| C | 3.162084  | 0.248563  | 2.461942  |
| S | 5.213551  | -0.000288 | 0.000208  |
| C | 3.162449  | -0.249379 | -2.461228 |
| P | 0.000195  | -0.229149 | -1.863804 |
| S | 0.000472  | -2.401743 | -2.309366 |
| C | 0.000115  | -3.224423 | -0.716463 |
| C | -1.211066 | -3.572942 | -0.107385 |
| C | -1.207446 | -4.262526 | 1.103242  |
| C | -0.000460 | -4.607417 | 1.710325  |
| C | 1.206813  | -4.261479 | 1.104414  |
| C | 1.211005  | -3.571914 | -0.106225 |

|   |           |           |           |
|---|-----------|-----------|-----------|
| C | -3.161877 | -0.248724 | -2.461421 |
| S | -5.213204 | -0.000764 | 0.000248  |
| C | -3.161762 | 0.247756  | 2.461962  |
| S | -0.000194 | 2.402650  | 2.308974  |
| C | -0.000441 | 3.224901  | 0.715858  |
| C | -1.211589 | 3.572592  | 0.106240  |
| C | -1.207893 | 4.261878  | -1.104558 |
| C | -0.000868 | 4.607314  | -1.711252 |
| C | 1.206368  | 4.262215  | -1.104788 |
| C | 1.210490  | 3.572932  | 0.106012  |
| H | 4.234353  | -0.060227 | -2.459663 |
| H | 2.656439  | 0.480609  | -3.095492 |
| H | 2.968816  | -1.255573 | -2.837721 |
| H | -2.963007 | -1.252923 | -2.840455 |
| H | -4.234753 | -0.065171 | -2.458853 |
| H | -2.660157 | 0.485593  | -3.094137 |
| H | -4.234968 | 0.066143  | 2.459056  |
| H | -2.661520 | -0.488134 | 3.094038  |
| H | -2.961061 | 1.251214  | 2.841972  |
| H | 4.235380  | 0.067483  | 2.459007  |
| H | 2.960884  | 1.251961  | 2.841842  |
| H | 2.662256  | -0.487516 | 3.094128  |
| H | -2.148030 | -3.315295 | -0.585806 |
| H | -2.148821 | -4.535213 | 1.566703  |
| H | -0.000683 | -5.149432 | 2.649181  |
| H | 2.147977  | -4.533370 | 1.568771  |
| H | 2.148207  | -3.313541 | -0.583786 |
| H | -2.148587 | 3.314572  | 0.584394  |
| H | -2.149245 | 4.533923  | -1.568443 |
| H | -0.001030 | 5.149099  | -2.650241 |
| H | 2.147554  | 4.534519  | -1.568859 |
| H | 2.147653  | 3.315173  | 0.583982  |

$E(\omega B97X-D/6-311+G^{**}) = -3346.086629$   
 $G(\omega B97X-D/6-311+G^{**}) = -3345.739681$

|   |           |           |           |
|---|-----------|-----------|-----------|
| C | 0.594663  | -3.200825 | 0.069086  |
| C | -0.395197 | -2.858502 | -0.850957 |
| C | -1.740958 | -3.020847 | -0.521820 |
| C | -2.095940 | -3.500777 | 0.731363  |
| C | -1.109434 | -3.823302 | 1.657409  |
| C | 0.232739  | -3.680511 | 1.323031  |
| S | 0.034550  | -2.125869 | -2.418544 |
| P | 0.248091  | -0.027139 | -1.869918 |
| C | 1.601008  | -0.084424 | -0.677503 |
| N | 2.925360  | -0.145339 | -1.085187 |
| C | 3.761289  | -0.155019 | -0.000633 |
| N | 2.930999  | -0.106414 | 1.086658  |
| C | 1.604345  | -0.060982 | 0.684635  |
| C | 3.381271  | -0.243511 | -2.458950 |

|   |           |           |           |
|---|-----------|-----------|-----------|
| S | 5.432541  | -0.209517 | 0.002472  |
| C | 3.406586  | -0.040425 | 2.455794  |
| P | 0.255167  | 0.015109  | 1.879812  |
| S | 0.260909  | 2.126976  | 2.416512  |
| C | -0.063039 | 2.893311  | 0.840057  |
| C | -1.379200 | 3.184486  | 0.481226  |
| C | -1.656339 | 3.702915  | -0.776196 |
| C | -0.622462 | 3.934396  | -1.677439 |
| C | 0.691415  | 3.659543  | -1.314538 |
| C | 0.975615  | 3.140470  | -0.056363 |
| C | -1.093480 | 0.106478  | -0.672413 |
| N | -2.416906 | 0.176795  | -1.073088 |
| C | -3.249390 | 0.114512  | 0.009831  |
| N | -2.418633 | 0.016981  | 1.091674  |
| C | -1.095052 | 0.000222  | 0.685428  |
| C | -2.883342 | 0.274459  | -2.442451 |
| C | -2.874789 | -0.087901 | 2.464340  |
| S | -4.923579 | 0.143294  | 0.001650  |
| H | 4.391472  | -0.503372 | 2.492802  |
| H | 2.716207  | -0.581231 | 3.104496  |
| H | 3.484498  | 0.997602  | 2.786330  |
| H | -2.624817 | 0.819133  | 3.019459  |
| H | -3.955973 | -0.214898 | 2.440294  |
| H | -2.408849 | -0.953832 | 2.938390  |
| H | -3.865595 | 0.744036  | -2.430858 |
| H | -2.184704 | 0.884262  | -3.016446 |
| H | -2.963973 | -0.716501 | -2.895467 |
| H | 4.448750  | -0.029181 | -2.469024 |
| H | 3.209693  | -1.249725 | -2.847461 |
| H | 2.849861  | 0.483489  | -3.075369 |
| H | -2.183663 | 2.984417  | 1.179553  |
| H | -2.682916 | 3.916869  | -1.050986 |
| H | -0.838968 | 4.336455  | -2.660724 |
| H | 1.499477  | 3.846692  | -2.012618 |
| H | 1.997852  | 2.918625  | 0.227545  |
| H | -2.507429 | -2.748083 | -1.237902 |
| H | -3.144536 | -3.612440 | 0.982651  |
| H | -1.385836 | -4.194667 | 2.637893  |
| H | 1.002794  | -3.941044 | 2.040192  |
| H | 1.639462  | -3.081073 | -0.192624 |

### 3a' in/out

|                      |               |           |           |
|----------------------|---------------|-----------|-----------|
| G(M06-2X/6-311+G**)= | -3345.583246  |           |           |
| E(M06-2X/6-311+G**)= | -3345.9307058 |           |           |
| C                    | -3.372843     | -2.734459 | 0.476913  |
| C                    | -3.390163     | -1.939302 | -0.669537 |
| C                    | -4.603336     | -1.475396 | -1.176584 |
| C                    | -5.794076     | -1.806756 | -0.537972 |

|   |           |           |           |
|---|-----------|-----------|-----------|
| C | -5.777184 | -2.584361 | 0.614810  |
| C | -4.564695 | -3.044599 | 1.121125  |
| S | -1.890349 | -1.517938 | -1.550919 |
| P | -0.745152 | -0.693321 | 0.091771  |
| C | -0.779131 | 1.078830  | -0.264373 |
| N | -1.864245 | 1.860416  | 0.097781  |
| C | -1.612051 | 3.181892  | -0.161560 |
| N | -0.350051 | 3.206060  | -0.690568 |
| C | 0.175124  | 1.921675  | -0.758268 |
| C | -3.149783 | 1.385092  | 0.583934  |
| S | -2.627346 | 4.479924  | 0.111701  |
| C | 0.334847  | 4.438967  | -1.041664 |
| P | 1.846430  | 1.612815  | -1.366590 |
| S | 3.047594  | 2.189085  | 0.370755  |
| C | 2.412319  | 1.061289  | 1.594105  |
| C | 3.065297  | -0.153228 | 1.812673  |
| C | 2.520350  | -1.085158 | 2.688509  |
| C | 1.330919  | -0.801451 | 3.355396  |
| C | 0.694668  | 0.421286  | 3.159095  |
| C | 1.231397  | 1.355955  | 2.278607  |
| C | 0.914502  | -1.005287 | -0.546110 |
| N | 1.517079  | -2.242642 | -0.381962 |
| C | 2.820565  | -2.197952 | -0.795861 |
| N | 2.996362  | -0.928887 | -1.277503 |
| C | 1.841416  | -0.178437 | -1.112682 |
| C | 0.888768  | -3.401454 | 0.227715  |
| C | 4.268373  | -0.462572 | -1.804314 |
| S | 3.981626  | -3.398610 | -0.704883 |
| H | -0.402594 | 5.137973  | -1.432668 |
| H | 1.088189  | 4.226413  | -1.799575 |
| H | 0.809289  | 4.873180  | -0.159641 |
| H | 4.963542  | -0.253170 | -0.988759 |
| H | 4.687480  | -1.243805 | -2.436438 |
| H | 4.100492  | 0.442960  | -2.385740 |
| H | 1.603194  | -4.220983 | 0.184382  |
| H | 0.641748  | -3.181388 | 1.269529  |
| H | -0.013912 | -3.664012 | -0.326930 |
| H | -3.523856 | 2.097422  | 1.317537  |
| H | -3.863030 | 1.314185  | -0.239520 |
| H | -3.024188 | 0.402942  | 1.041602  |
| H | 3.985512  | -0.377609 | 1.284516  |
| H | 3.024866  | -2.033231 | 2.837535  |
| H | 0.905026  | -1.528463 | 4.037353  |
| H | -0.224495 | 0.648539  | 3.686588  |
| H | 0.737287  | 2.307385  | 2.113213  |
| H | -4.608801 | -0.852623 | -2.063749 |
| H | -6.734103 | -1.445082 | -0.937625 |
| H | -6.704226 | -2.833227 | 1.116654  |
| H | -4.546501 | -3.657347 | 2.014713  |

H -2.430192 -3.103907 0.864883

**3a' out/out**

G(M06-2X/6-311+G\*\*) = -3345.573774

E(M06-2X/6-311+G\*\*) = -3345.917459

C 0.656178 -1.044885 0.187095  
C -0.656271 -1.044891 -0.187039  
N -1.044122 -2.371309 -0.302059  
C -2.381951 -2.861142 -0.590963  
P 1.791968 0.306660 0.577675  
S 3.015607 0.392106 -1.206412  
C 4.549975 -0.234974 -0.532992  
C 5.146938 -1.333197 -1.150433  
C 6.354301 -1.828212 -0.667179  
C 6.958476 -1.242044 0.439677  
C 6.360638 -0.146078 1.055095  
C 5.165072 0.365581 0.565232  
C 0.000008 -3.203485 -0.000086  
N 1.044093 -2.371279 0.302010  
C 2.382021 -2.860981 0.590644  
S 0.000061 -4.873651 -0.000230  
P -1.792113 0.306631 -0.577507  
S -3.015621 0.392259 1.206630  
C -4.549959 -0.234948 0.533249  
C -5.146724 -1.333360 1.150537  
C -6.354028 -1.828483 0.667239  
C -6.958324 -1.242230 -0.439505  
C -6.360674 -0.146078 -1.054775  
C -5.165175 0.365686 -0.564868  
C 0.655204 1.660381 0.191369  
N 1.040297 2.987897 0.312091  
C -0.000042 3.822784 -0.000106  
N -1.040381 2.987880 -0.312220  
C -0.655279 1.660361 -0.191445  
C 2.366037 3.460363 0.672170  
C -2.366105 3.460300 -0.672410  
S -0.000025 5.493654 -0.000193  
H -2.295720 -3.751399 -1.211988  
H -2.945881 -2.089693 -1.116507  
H -2.896605 -3.120989 0.335963  
H -3.014933 3.484862 0.205086  
H -2.261551 4.464482 -1.078589  
H -2.785872 2.795040 -1.428123  
H 2.261480 4.464521 1.078404  
H 2.785913 2.795079 1.427799  
H 3.014773 3.485002 -0.205390  
H 2.295964 -3.751706 1.211019  
H 2.896812 -3.120018 -0.336432  
H 2.945729 -2.089769 1.116779



|   |           |           |           |
|---|-----------|-----------|-----------|
| H | -4.662231 | -1.797862 | 2.001590  |
| H | -6.815122 | -2.680749 | 1.151886  |
| H | -7.893224 | -1.635316 | -0.820317 |
| H | -6.830818 | 0.320050  | -1.912412 |
| H | -4.708332 | 1.228656  | -1.034719 |
| H | 4.662569  | -1.797622 | -2.001598 |
| H | 6.815537  | -2.680330 | -1.151951 |
| H | 7.893422  | -1.635050 | 0.820457  |
| H | 6.830685  | 0.319998  | 1.912812  |
| H | 4.708110  | 1.228419  | 1.035210  |

### 3a' out/out

G(B3LYP/6-311+G\*\*)= -3346.196090

E(B3LYP/6-311+G\*\*)= -3346.529726

|   |           |           |           |
|---|-----------|-----------|-----------|
| C | -0.646547 | 1.632400  | -0.229795 |
| C | 0.646502  | 1.632419  | 0.229808  |
| N | 1.025623  | 2.965215  | 0.375928  |
| C | -0.000055 | 3.805205  | 0.000008  |
| N | -1.025702 | 2.965184  | -0.375931 |
| P | 1.770341  | 0.267557  | 0.641680  |
| S | 3.064970  | 0.375442  | -1.144704 |
| C | 4.641926  | -0.207928 | -0.506211 |
| C | 5.260397  | -1.276851 | -1.163398 |
| C | 6.519497  | -1.713248 | -0.754641 |
| C | 7.159180  | -1.102013 | 0.321826  |
| C | 6.539625  | -0.041182 | 0.981946  |
| C | 5.291403  | 0.414584  | 0.564930  |
| C | 2.323020  | 3.446165  | 0.830083  |
| S | -0.000074 | 5.480753  | -0.000008 |
| C | -2.323102 | 3.446098  | -0.830113 |
| P | -1.770346 | 0.267503  | -0.641664 |
| S | -3.064973 | 0.375350  | 1.144726  |
| C | -4.641930 | -0.208008 | 0.506222  |
| C | -5.260476 | -1.276847 | 1.163474  |
| C | -6.519580 | -1.713221 | 0.754705  |
| C | -7.159191 | -1.102047 | -0.321839 |
| C | -6.539562 | -0.041299 | -0.982023 |
| C | -5.291336 | 0.414445  | -0.564996 |
| C | 0.645449  | -1.096486 | 0.233302  |
| C | -0.645409 | -1.096505 | -0.233295 |
| N | -1.024061 | -2.428494 | -0.380605 |
| C | 0.000061  | -3.266129 | -0.000015 |
| N | 1.024147  | -2.428462 | 0.380603  |
| C | -2.318632 | -2.925326 | -0.827609 |
| S | 0.000089  | -4.940598 | -0.000016 |
| C | 2.318730  | -2.925255 | 0.827617  |
| H | -2.155491 | -3.792805 | -1.466065 |
| H | -2.831253 | -2.142654 | -1.385659 |
| H | -2.930537 | -3.228037 | 0.024203  |

|   |           |           |           |
|---|-----------|-----------|-----------|
| H | -3.046511 | 3.438651  | -0.012105 |
| H | -2.190710 | 4.467150  | -1.183808 |
| H | -2.678918 | 2.813231  | -1.644405 |
| H | 2.190606  | 4.467215  | 1.183777  |
| H | 2.678866  | 2.813311  | 1.644372  |
| H | 3.046416  | 3.438735  | 0.012063  |
| H | 2.155613  | -3.792729 | 1.466087  |
| H | 2.930642  | -3.227963 | -0.024191 |
| H | 2.831331  | -2.142561 | 1.385655  |
| H | -4.756147 | -1.760803 | 1.991476  |
| H | -6.993874 | -2.538276 | 1.274002  |
| H | -8.134853 | -1.447471 | -0.643445 |
| H | -7.033730 | 0.443222  | -1.816632 |
| H | -4.827432 | 1.252961  | -1.069148 |
| H | 4.756011  | -1.760857 | -1.991335 |
| H | 6.993732  | -2.538369 | -1.273886 |
| H | 8.134838  | -1.447455 | 0.643424  |
| H | 7.033847  | 0.443386  | 1.816495  |
| H | 4.827558  | 1.253163  | 1.069031  |

### 3a' out/out

$G(\omega B97X-D/6-311+G^{**}) = -3345.716938$

$E(\omega B97X-D/6-311+G^{**}) = -3346.061949$

|   |           |           |           |
|---|-----------|-----------|-----------|
| C | -0.648694 | 1.666533  | -0.208464 |
| C | 0.648873  | 1.666387  | 0.207750  |
| N | 1.031991  | 2.992965  | 0.339438  |
| C | 0.000313  | 3.826223  | -0.000303 |
| N | -1.031537 | 2.993202  | -0.340064 |
| P | 1.780882  | 0.309022  | 0.586851  |
| S | 2.996821  | 0.396928  | -1.196605 |
| C | 4.538660  | -0.235167 | -0.542603 |
| C | 5.090204  | -1.374961 | -1.123724 |
| C | 6.300801  | -1.874394 | -0.657352 |
| C | 6.954831  | -1.249286 | 0.397238  |
| C | 6.403371  | -0.111477 | 0.976495  |
| C | 5.204110  | 0.403353  | 0.502543  |
| C | 2.345048  | 3.464182  | 0.734930  |
| S | 0.000433  | 5.496990  | -0.000210 |
| C | -2.344557 | 3.464734  | -0.735314 |
| P | -1.781197 | 0.309464  | -0.587176 |
| S | -2.996382 | 0.397813  | 1.196825  |
| C | -4.538391 | -0.234589 | 0.543484  |
| C | -5.089279 | -1.374818 | 1.124371  |
| C | -6.299873 | -1.874506 | 0.658268  |
| C | -6.954553 | -1.249211 | -0.395812 |
| C | -6.403768 | -0.110945 | -0.974813 |
| C | -5.204506 | 0.404127  | -0.501121 |
| C | 0.647857  | -1.047912 | 0.209813  |
| C | -0.648337 | -1.047754 | -0.210677 |

|   |           |           |           |
|---|-----------|-----------|-----------|
| N | -1.032989 | -2.373574 | -0.339932 |
| C | -0.000554 | -3.203613 | -0.000222 |
| N | 1.032075  | -2.373799 | 0.339518  |
| C | -2.344003 | -2.869162 | -0.715460 |
| S | -0.000778 | -4.873475 | -0.000328 |
| C | 2.343350  | -2.869561 | 0.713886  |
| H | -2.222386 | -3.684752 | -1.427995 |
| H | -2.921050 | -2.063728 | -1.170235 |
| H | -2.872926 | -3.244560 | 0.162288  |
| H | -3.017316 | 3.497200  | 0.124366  |
| H | -2.231098 | 4.467388  | -1.144674 |
| H | -2.749688 | 2.797338  | -1.497923 |
| H | 2.231801  | 4.467121  | 1.143652  |
| H | 2.749613  | 2.797091  | 1.498111  |
| H | 3.018173  | 3.495885  | -0.124488 |
| H | 2.222079  | -3.686609 | 1.424787  |
| H | 2.872347  | -3.242984 | -0.164672 |
| H | 2.920130  | -2.064805 | 1.170220  |
| H | -4.567366 | -1.869391 | 1.935611  |
| H | -6.724887 | -2.760912 | 1.115058  |
| H | -7.892753 | -1.646692 | -0.765326 |
| H | -6.913420 | 0.384618  | -1.793235 |
| H | -4.785854 | 1.300674  | -0.943165 |
| H | 4.568810  | -1.869400 | -1.935379 |
| H | 6.726309  | -2.760464 | -1.114333 |
| H | 7.893040  | -1.646552 | 0.766964  |
| H | 6.912505  | 0.383935  | 1.795331  |
| H | 4.784962  | 1.299555  | 0.944812  |

### PhSeSePh

G(M06-2X/6-311+G\*\*)= -5266.192308

E(M06-2X/6-311+G\*\*)= -5266.3310827

|    |           |           |           |
|----|-----------|-----------|-----------|
| C  | -0.004742 | -0.079123 | 0.138387  |
| C  | -0.196555 | -0.002062 | 1.517822  |
| C  | 0.872035  | -0.207694 | 2.388836  |
| C  | 2.136220  | -0.487851 | 1.876616  |
| C  | 2.329479  | -0.566298 | 0.502402  |
| C  | 1.258665  | -0.362997 | -0.365647 |
| Se | -1.940029 | 0.350154  | 2.251172  |
| Se | -2.754064 | -1.859602 | 2.172388  |
| C  | -1.503424 | -2.628523 | 3.415862  |
| C  | -0.358993 | -3.252319 | 2.921916  |
| C  | 0.569419  | -3.793159 | 3.807675  |
| C  | 0.356901  | -3.706669 | 5.178557  |
| C  | -0.786744 | -3.079976 | 5.669293  |
| C  | -1.719386 | -2.541601 | 4.791136  |
| H  | 0.708066  | -0.165993 | 3.459614  |
| H  | 2.965228  | -0.651349 | 2.555083  |

|   |           |           |           |
|---|-----------|-----------|-----------|
| H | 3.313325  | -0.785670 | 0.104736  |
| H | 1.408768  | -0.422529 | -1.437228 |
| H | -0.843657 | 0.074796  | -0.529819 |
| H | -2.608475 | -2.047857 | 5.164913  |
| H | -0.953927 | -3.013377 | 6.737926  |
| H | 1.080582  | -4.126642 | 5.867124  |
| H | 1.460593  | -4.274400 | 3.422298  |
| H | -0.190443 | -3.296349 | 1.851943  |

### Ts\_1 E=Se

G(M06-2X/6-311+G\*\*)= -7352.261287

E(M06-2X/6-311+G\*\*)= -7352.601457

|    |           |           |           |
|----|-----------|-----------|-----------|
| C  | 3.307295  | 3.366006  | -0.398728 |
| C  | 1.943953  | 3.239808  | -0.111812 |
| C  | 1.184515  | 4.382168  | 0.162083  |
| C  | 1.785238  | 5.634912  | 0.157754  |
| C  | 3.143873  | 5.754056  | -0.124303 |
| C  | 3.903895  | 4.620796  | -0.403377 |
| Se | 1.110855  | 1.495348  | -0.105020 |
| Se | -0.128548 | -0.275517 | -1.759270 |
| C  | -1.911986 | 0.402622  | -1.950078 |
| C  | -2.623546 | 0.137897  | -3.122253 |
| C  | -3.954406 | 0.531446  | -3.225615 |
| C  | -4.567958 | 1.204027  | -2.173047 |
| C  | -3.850927 | 1.487851  | -1.012533 |
| C  | -2.525486 | 1.085724  | -0.897755 |
| P  | 0.812783  | -0.370416 | 2.026621  |
| C  | -0.898123 | -0.711206 | 1.743914  |
| C  | -1.523925 | -1.569729 | 0.848441  |
| N  | -2.884257 | -1.347511 | 0.972483  |
| C  | -3.139625 | -0.380874 | 1.911225  |
| N  | -1.907265 | -0.006395 | 2.381926  |
| P  | -0.820984 | -2.601580 | -0.405715 |
| C  | 0.846549  | -2.578699 | 0.184847  |
| C  | 1.465163  | -1.697969 | 1.061103  |
| N  | 2.825988  | -1.941827 | 0.970484  |
| C  | 3.087235  | -2.941970 | 0.069202  |
| N  | 1.854573  | -3.318880 | -0.406533 |
| C  | 3.836694  | -1.212548 | 1.713637  |
| S  | 4.571911  | -3.574434 | -0.349447 |
| C  | 1.637103  | -4.334315 | -1.420336 |
| C  | -3.895401 | -1.951066 | 0.122059  |
| S  | -4.627922 | 0.218258  | 2.375161  |
| C  | -1.677824 | 1.022311  | 3.379586  |
| H  | -1.106547 | 1.843019  | 2.937774  |
| H  | -1.125335 | 0.603714  | 4.222780  |
| H  | -2.647803 | 1.383697  | 3.713288  |
| H  | 4.810272  | -1.576385 | 1.393048  |
| H  | 3.748070  | -0.145204 | 1.497215  |

|   |           |           |           |
|---|-----------|-----------|-----------|
| H | 3.710334  | -1.384514 | 2.784399  |
| H | 1.286834  | -3.871023 | -2.346035 |
| H | 2.586349  | -4.834628 | -1.598274 |
| H | 0.894593  | -5.050409 | -1.064274 |
| H | -4.867279 | -1.767834 | 0.574653  |
| H | -3.862221 | -1.496065 | -0.872939 |
| H | -3.709484 | -3.023472 | 0.048661  |
| H | -2.135847 | -0.376145 | -3.941835 |
| H | -4.507849 | 0.316453  | -4.132151 |
| H | -5.604103 | 1.509988  | -2.255129 |
| H | -4.327840 | 1.997475  | -0.184151 |
| H | -1.960808 | 1.303487  | 0.003013  |
| H | 0.126206  | 4.280564  | 0.374103  |
| H | 1.195841  | 6.518522  | 0.372769  |
| H | 3.610607  | 6.732053  | -0.129642 |
| H | 4.960012  | 4.716644  | -0.626226 |
| H | 3.889632  | 2.479378  | -0.622782 |

### TS\_3 E=Se

G(M06-2X/6-311+G\*\*)= -7352.229460

E(M06-2X/6-311+G\*\*)= -7352.5669929

|    |           |           |           |
|----|-----------|-----------|-----------|
| C  | -5.178332 | 0.153478  | -0.917410 |
| C  | -4.396194 | -0.995953 | -0.719373 |
| C  | -5.013838 | -2.255748 | -0.766880 |
| C  | -6.375723 | -2.360552 | -1.011091 |
| C  | -7.141046 | -1.213050 | -1.209684 |
| C  | -6.539799 | 0.043124  | -1.162313 |
| Se | -2.537245 | -0.842957 | -0.380319 |
| P  | 0.462630  | -0.488754 | -0.526275 |
| Se | -0.429238 | -0.361580 | 1.858232  |
| C  | -0.592147 | 1.537902  | 1.938006  |
| C  | -1.861034 | 2.114719  | 2.032952  |
| C  | -1.979834 | 3.494164  | 2.144783  |
| C  | -0.841009 | 4.297784  | 2.138563  |
| C  | 0.422878  | 3.721921  | 2.041126  |
| C  | 0.552370  | 2.340668  | 1.950088  |
| C  | 1.373162  | 0.979498  | -0.826914 |
| C  | 2.764011  | 1.155648  | -0.853438 |
| N  | 2.970972  | 2.501721  | -1.105919 |
| C  | 1.778302  | 3.167703  | -1.250290 |
| N  | 0.808695  | 2.217004  | -1.092719 |
| P  | 4.102037  | 0.039946  | -0.635679 |
| C  | 3.157699  | -1.421218 | -0.402208 |
| C  | 1.779874  | -1.626889 | -0.310314 |
| N  | 1.589637  | -2.963578 | -0.013438 |
| C  | 2.793751  | -3.614157 | 0.087306  |
| N  | 3.742480  | -2.655488 | -0.169738 |
| C  | 4.279003  | 3.116643  | -1.224070 |
| S  | 1.533240  | 4.788401  | -1.542989 |

|   |           |           |           |
|---|-----------|-----------|-----------|
| C | -0.606748 | 2.539138  | -1.198612 |
| C | 0.310576  | -3.609066 | 0.238747  |
| S | 3.032440  | -5.219354 | 0.450317  |
| C | 5.173518  | -2.889442 | -0.166806 |
| H | -0.818580 | 2.890211  | -2.209453 |
| H | 4.838950  | 2.977610  | -0.296871 |
| H | -1.199325 | 1.652697  | -0.977162 |
| H | -0.844052 | 3.333591  | -0.490215 |
| H | -0.477847 | -3.070942 | -0.288910 |
| H | 0.368583  | -4.634746 | -0.120819 |
| H | 0.096144  | -3.620980 | 1.309768  |
| H | 5.335704  | -3.957498 | -0.040413 |
| H | 5.600702  | -2.554897 | -1.114064 |
| H | 5.640803  | -2.344843 | 0.656819  |
| H | 4.130556  | 4.177527  | -1.413028 |
| H | 4.828504  | 2.662864  | -2.051651 |
| H | 1.533235  | 1.882845  | 1.874511  |
| H | 1.306270  | 4.348917  | 2.020696  |
| H | -0.937846 | 5.375224  | 2.199386  |
| H | -2.962398 | 3.944330  | 2.222483  |
| H | -2.739392 | 1.480477  | 2.000342  |
| H | -4.414003 | -3.144500 | -0.611314 |
| H | -6.843511 | -3.337318 | -1.048462 |
| H | -8.204182 | -1.297684 | -1.401398 |
| H | -7.134175 | 0.935796  | -1.317988 |
| H | -4.703729 | 1.127454  | -0.879580 |

### 3cis E=Se

G(M06-2X/6-311+G\*\*)= -7352.319009  
E(M06-2X/6-311+G\*\*)= -7352.66156

|    |           |           |           |
|----|-----------|-----------|-----------|
| N  | -2.880974 | 0.130551  | -1.465653 |
| C  | -1.511968 | -0.052681 | -1.316479 |
| C  | -0.949672 | 1.192395  | -1.264970 |
| N  | -1.985422 | 2.108330  | -1.360494 |
| C  | -3.188121 | 1.460769  | -1.460993 |
| P  | -0.783469 | -1.700845 | -1.139080 |
| C  | 0.949275  | -1.188837 | -1.267346 |
| C  | 1.511553  | 0.056261  | -1.317550 |
| N  | 2.880595  | -0.126937 | -1.466660 |
| C  | 3.187702  | -1.457135 | -1.463657 |
| N  | 1.984857  | -2.104744 | -1.364563 |
| P  | 0.783167  | 1.704064  | -1.135855 |
| Se | 0.781912  | 1.970708  | 1.197008  |
| C  | 2.622326  | 1.489207  | 1.500172  |
| C  | 2.963809  | 0.138689  | 1.588285  |
| C  | 4.288054  | -0.225445 | 1.806378  |
| C  | 5.263123  | 0.756776  | 1.965489  |
| C  | 4.916387  | 2.102713  | 1.896072  |
| C  | 3.596379  | 2.474700  | 1.655688  |

|    |           |           |           |
|----|-----------|-----------|-----------|
| C  | 3.907277  | 0.896086  | -1.585381 |
| S  | 4.705659  | -2.150967 | -1.550297 |
| C  | 1.883734  | -3.554154 | -1.322031 |
| C  | -1.885530 | 3.557805  | -1.317064 |
| S  | -4.705797 | 2.155157  | -1.547294 |
| C  | -3.907503 | -0.892397 | -1.586364 |
| Se | -0.781461 | -1.973971 | 1.193041  |
| C  | -2.621773 | -1.493100 | 1.497927  |
| C  | -3.595633 | -2.479013 | 1.651945  |
| C  | -4.915605 | -2.107644 | 1.893518  |
| C  | -5.262519 | -0.761884 | 1.965408  |
| C  | -4.287621 | 0.220738  | 1.807781  |
| C  | -2.963379 | -0.142815 | 1.588721  |
| H  | 4.542913  | 0.884136  | -0.699000 |
| H  | 3.431430  | 1.869148  | -1.693229 |
| H  | 4.518181  | 0.678307  | -2.461458 |
| H  | -0.839976 | 3.845918  | -1.419784 |
| H  | -2.472242 | 3.978134  | -2.133236 |
| H  | -2.285267 | 3.930276  | -0.372500 |
| H  | -4.542124 | -0.883602 | -0.699223 |
| H  | -4.519550 | -0.671666 | -2.460900 |
| H  | -3.431521 | -1.864953 | -1.698080 |
| H  | 2.484713  | -3.974178 | -2.127787 |
| H  | 2.266569  | -3.927009 | -0.370584 |
| H  | 0.840082  | -3.841912 | -1.443600 |
| H  | 2.192163  | -0.615375 | 1.472080  |
| H  | 4.559094  | -1.274054 | 1.836307  |
| H  | 6.293892  | 0.470589  | 2.136848  |
| H  | 5.674209  | 2.867024  | 2.022597  |
| H  | 3.320249  | 3.520078  | 1.589641  |
| H  | -2.191860 | 0.611563  | 1.473819  |
| H  | -4.558760 | 1.269258  | 1.839793  |
| H  | -6.293274 | -0.476152 | 2.137606  |
| H  | -5.673269 | -2.872286 | 2.018984  |
| H  | -3.319391 | -3.524214 | 1.583821  |

### TS\_2 Se

G(M06-2X/6-311+G\*\*)= -7352.265090

E(M06-2X/6-311+G\*\*)= -7352.6056444

|    |           |           |           |
|----|-----------|-----------|-----------|
| C  | -5.086279 | 0.531890  | -0.902566 |
| C  | -3.771245 | 0.157845  | -1.180027 |
| C  | -3.418925 | -1.192694 | -1.206232 |
| C  | -4.374132 | -2.166067 | -0.931198 |
| C  | -5.686908 | -1.792880 | -0.655470 |
| C  | -6.043128 | -0.447199 | -0.648810 |
| Se | -2.412687 | 1.493018  | -1.474019 |
| P  | -1.789725 | 1.507506  | 0.796022  |
| C  | -0.116638 | 2.177518  | 0.600569  |

|    |           |           |           |
|----|-----------|-----------|-----------|
| C  | 1.008893  | 1.574460  | 0.104420  |
| N  | 2.040561  | 2.487197  | 0.148322  |
| C  | 1.581219  | 3.684805  | 0.652539  |
| N  | 0.265135  | 3.477188  | 0.936931  |
| P  | 1.062761  | -0.121240 | -0.384388 |
| Se | 2.481294  | -1.036844 | -1.708668 |
| C  | 3.948817  | -1.596116 | -0.545242 |
| C  | 5.030906  | -2.183820 | -1.195021 |
| C  | 6.119906  | -2.621144 | -0.448442 |
| C  | 6.127224  | -2.470420 | 0.934560  |
| C  | 5.040531  | -1.881120 | 1.571458  |
| C  | 3.944935  | -1.441106 | 0.833770  |
| C  | 3.412567  | 2.246123  | -0.262021 |
| S  | 2.445426  | 5.097048  | 0.882182  |
| C  | -0.577867 | 4.517244  | 1.501119  |
| C  | -1.316053 | -0.225130 | 0.999217  |
| C  | -0.257592 | -0.916122 | 0.472535  |
| N  | -0.437125 | -2.252046 | 0.751376  |
| C  | -1.622475 | -2.431329 | 1.437569  |
| N  | -2.127302 | -1.180072 | 1.614984  |
| C  | -3.400129 | -0.896999 | 2.257049  |
| S  | -2.281358 | -3.892106 | 1.926528  |
| C  | 0.474354  | -3.326452 | 0.396470  |
| H  | 4.014036  | 3.069390  | 0.118466  |
| H  | 3.486835  | 2.211520  | -1.350143 |
| H  | 3.759271  | 1.301293  | 0.160739  |
| H  | 1.498627  | -3.017319 | 0.612459  |
| H  | 0.208647  | -4.193618 | 0.997502  |
| H  | 0.381715  | -3.574974 | -0.662270 |
| H  | -3.681504 | -1.775722 | 2.833112  |
| H  | -3.286797 | -0.035099 | 2.914369  |
| H  | -4.165340 | -0.693448 | 1.503579  |
| H  | -0.166805 | 4.840750  | 2.457834  |
| H  | -0.599997 | 5.373045  | 0.825855  |
| H  | -1.581374 | 4.118830  | 1.638437  |
| H  | 5.031159  | -2.302972 | -2.273787 |
| H  | 6.962951  | -3.079363 | -0.951649 |
| H  | 6.977348  | -2.809642 | 1.513507  |
| H  | 5.040309  | -1.759953 | 2.648163  |
| H  | 3.098615  | -0.978121 | 1.332603  |
| H  | -2.393636 | -1.474275 | -1.423419 |
| H  | -4.086910 | -3.210865 | -0.915462 |
| H  | -6.430059 | -2.551904 | -0.442062 |
| H  | -7.065183 | -0.156144 | -0.436053 |
| H  | -5.351958 | 1.582023  | -0.883087 |

### 3ipso E=Se

G(M06-2X/6-311+G\*\*) = -7352.292741



E(M06-2X/6-311+G\*\*)= -7352.6348747

|    |           |           |           |
|----|-----------|-----------|-----------|
| C  | 1.399517  | 0.205327  | 2.551140  |
| C  | 0.484185  | -0.784781 | 2.194701  |
| C  | 0.883751  | -2.117634 | 2.088824  |
| C  | 2.213171  | -2.456320 | 2.315474  |
| C  | 3.133876  | -1.467563 | 2.654036  |
| C  | 2.726468  | -0.142914 | 2.780807  |
| Se | -1.298648 | -0.298014 | 1.655979  |
| P  | -0.355387 | 0.228558  | -0.452523 |
| C  | 0.622936  | 1.657294  | -0.474990 |
| C  | 2.012251  | 1.709565  | -0.629794 |
| N  | 2.344560  | 3.045916  | -0.481308 |
| C  | 1.242836  | 3.821830  | -0.208150 |
| N  | 0.188168  | 2.959110  | -0.185390 |
| P  | 3.257580  | 0.485731  | -0.885544 |
| C  | 2.150666  | -0.889128 | -0.950403 |
| C  | 0.758870  | -1.007968 | -0.934213 |
| N  | 0.459127  | -2.376480 | -0.983622 |
| C  | 1.608240  | -3.106150 | -1.032231 |
| N  | 2.627179  | -2.185973 | -1.033137 |
| C  | -0.868742 | -2.955219 | -1.069818 |
| S  | 1.753788  | -4.772885 | -1.058751 |
| C  | 4.038791  | -2.517078 | -1.023777 |
| C  | 3.700843  | 3.548516  | -0.585812 |
| S  | 1.204432  | 5.472847  | 0.041784  |
| C  | -1.178786 | 3.374556  | 0.068483  |
| Se | -2.153391 | 0.436198  | -1.847579 |
| C  | -3.585369 | -0.032328 | -0.649763 |
| C  | -4.138161 | 0.935933  | 0.187720  |
| C  | -5.153440 | 0.581445  | 1.069369  |
| C  | -5.625198 | -0.726909 | 1.099839  |
| C  | -5.095564 | -1.682157 | 0.236893  |
| C  | -4.074690 | -1.338253 | -0.640794 |
| H  | -1.137532 | 4.337626  | 0.574088  |
| H  | 4.321478  | 3.100920  | 0.193809  |
| H  | -1.733591 | 3.477198  | -0.866467 |
| H  | -1.661528 | 2.640437  | 0.715330  |
| H  | -1.309206 | -2.742436 | -2.046730 |
| H  | -0.762059 | -4.030978 | -0.941672 |
| H  | -1.503378 | -2.551101 | -0.278636 |
| H  | 4.129214  | -3.598908 | -1.084695 |
| H  | 4.532468  | -2.048779 | -1.877551 |
| H  | 4.489486  | -2.149570 | -0.098226 |
| H  | 3.666620  | 4.628309  | -0.462667 |
| H  | 4.111016  | 3.292466  | -1.564749 |
| H  | 0.170130  | -2.882467 | 1.802926  |
| H  | 2.525296  | -3.488856 | 2.204802  |
| H  | 4.172187  | -1.729807 | 2.821799  |
| H  | 3.444653  | 0.625473  | 3.040770  |

|   |           |           |           |
|---|-----------|-----------|-----------|
| H | 1.080047  | 1.238904  | 2.622584  |
| H | -3.660567 | -2.076112 | -1.316674 |
| H | -5.474090 | -2.697014 | 0.249051  |
| H | -6.414929 | -1.000592 | 1.789092  |
| H | -5.575718 | 1.328810  | 1.730127  |
| H | -3.777047 | 1.956094  | 0.149512  |

### 3b'

G(M06-2X/6-311+G\*\*)= -7352.338864

E(M06-2X/6-311+G\*\*)= -7352.683752

|    |           |           |           |
|----|-----------|-----------|-----------|
| C  | -3.213049 | -1.574645 | 0.794247  |
| C  | -1.981850 | -2.230688 | 0.753018  |
| C  | -1.182233 | -2.299818 | 1.893930  |
| C  | -1.610467 | -1.689002 | 3.069886  |
| C  | -2.825537 | -1.010865 | 3.105181  |
| C  | -3.630101 | -0.959423 | 1.969097  |
| Se | -1.341474 | -2.922256 | -0.919863 |
| P  | -0.116737 | -1.041921 | -1.567011 |
| C  | 1.133678  | -0.949342 | -0.269422 |
| N  | 2.314686  | -1.671141 | -0.373708 |
| C  | 3.148517  | -1.379369 | 0.668763  |
| N  | 2.439752  | -0.513764 | 1.459451  |
| C  | 1.210145  | -0.225720 | 0.887928  |
| C  | 2.659942  | -2.543796 | -1.481999 |
| S  | 4.713619  | -1.910815 | 0.930892  |
| C  | 2.988071  | 0.059954  | 2.676949  |
| P  | 0.116805  | 1.042128  | 1.567107  |
| Se | 1.341493  | 2.922308  | 0.919610  |
| C  | 1.981861  | 2.230578  | -0.753200 |
| C  | 1.182257  | 2.299703  | -1.894133 |
| C  | 1.610523  | 1.688947  | -3.070102 |
| C  | 2.825632  | 1.010871  | -3.105394 |
| C  | 3.630161  | 0.959409  | -1.969290 |
| C  | 3.213065  | 1.574554  | -0.794417 |
| C  | -1.210165 | 0.225758  | -0.887723 |
| C  | -1.133702 | 0.949393  | 0.269613  |
| N  | -2.314718 | 1.671161  | 0.373906  |
| C  | -3.148566 | 1.379337  | -0.668536 |
| N  | -2.439767 | 0.513787  | -1.459257 |
| C  | -2.988029 | -0.059938 | -2.676773 |
| S  | -4.713749 | 1.910623  | -0.930551 |
| C  | -2.660042 | 2.543786  | 1.482192  |
| H  | 3.510254  | -0.724134 | 3.223296  |
| H  | 2.173130  | 0.462375  | 3.277374  |
| H  | 3.694941  | 0.857277  | 2.437873  |
| H  | -1.895822 | 3.314662  | 1.595802  |
| H  | -3.618819 | 3.003631  | 1.251508  |
| H  | -2.740640 | 1.958676  | 2.401226  |

|   |           |           |           |
|---|-----------|-----------|-----------|
| H | -3.510629 | 0.724039  | -3.222876 |
| H | -2.173007 | -0.461886 | -3.277410 |
| H | -3.694523 | -0.857611 | -2.437754 |
| H | 3.619125  | -3.003002 | -1.251731 |
| H | 1.896137  | -3.315172 | -1.595054 |
| H | 2.739661  | -1.958808 | -2.401183 |
| H | 0.231057  | 2.817862  | -1.855823 |
| H | 0.988755  | 1.736974  | -3.956748 |
| H | 3.149925  | 0.530693  | -4.021565 |
| H | 4.577350  | 0.431597  | -1.985212 |
| H | 3.835638  | 1.525010  | 0.091956  |
| H | -3.835673 | -1.525153 | -0.092092 |
| H | -4.577259 | -0.431556 | 1.984970  |
| H | -3.149751 | -0.530619 | 4.021346  |
| H | -0.988702 | -1.737032 | 3.956534  |
| H | -0.231055 | -2.818013 | 1.855620  |

### 3b' in/out

G(M06-2X/6-311+G\*\*)= -7352.329418  
E(M06-2X/6-311+G\*\*)= -7352.671357

|    |           |           |           |
|----|-----------|-----------|-----------|
| N  | 0.979579  | -2.507090 | -0.300034 |
| C  | 0.625008  | -1.176961 | -0.467597 |
| C  | 1.672206  | -0.557566 | -1.090020 |
| N  | 2.645703  | -1.525805 | -1.289137 |
| C  | 2.242113  | -2.729262 | -0.777315 |
| P  | -0.927272 | -0.538024 | 0.202282  |
| C  | -0.625205 | 1.199961  | -0.190139 |
| N  | -1.529185 | 2.187365  | 0.171408  |
| C  | -1.043145 | 3.425987  | -0.151954 |
| N  | 0.179924  | 3.191421  | -0.720113 |
| C  | 0.452754  | 1.829972  | -0.745797 |
| C  | -2.861793 | 1.989930  | 0.718833  |
| S  | -1.789381 | 4.899983  | 0.093817  |
| C  | 1.067076  | 4.255650  | -1.157952 |
| P  | 1.998724  | 1.190064  | -1.423648 |
| Se | 3.464130  | 1.616666  | 0.343234  |
| C  | 2.611600  | 0.477704  | 1.632435  |
| C  | 3.058034  | -0.835815 | 1.785231  |
| C  | 2.371904  | -1.706155 | 2.625073  |
| C  | 1.249574  | -1.262471 | 3.320128  |
| C  | 0.821070  | 0.055364  | 3.186932  |
| C  | 1.497820  | 0.930382  | 2.341399  |
| C  | 3.956023  | -1.329636 | -1.886952 |
| S  | 3.139413  | -4.139975 | -0.718819 |
| C  | 0.161355  | -3.515747 | 0.349940  |
| Se | -2.350958 | -1.189906 | -1.493625 |
| C  | -3.932648 | -1.259255 | -0.391619 |
| C  | -5.037298 | -0.488530 | -0.750250 |

|   |           |           |           |
|---|-----------|-----------|-----------|
| C | -6.188865 | -0.525809 | 0.030845  |
| C | -6.233525 | -1.315488 | 1.174756  |
| C | -5.128180 | -2.083280 | 1.530546  |
| C | -3.981181 | -2.066108 | 0.744440  |
| H | 0.452494  | 5.083437  | -1.507210 |
| H | 1.694487  | 3.887791  | -1.969688 |
| H | 1.692776  | 4.594638  | -0.330113 |
| H | 4.715474  | -1.213537 | -1.111106 |
| H | 4.193355  | -2.205000 | -2.489551 |
| H | 3.931828  | -0.437773 | -2.512008 |
| H | 0.792874  | -4.383771 | 0.529672  |
| H | -0.207643 | -3.120762 | 1.299147  |
| H | -0.677696 | -3.794192 | -0.290977 |
| H | -3.041564 | 2.755804  | 1.471947  |
| H | -3.611069 | 2.085163  | -0.069344 |
| H | -2.928902 | 0.997856  | 1.166337  |
| H | 3.924200  | -1.186718 | 1.235169  |
| H | 2.713250  | -2.730993 | 2.720343  |
| H | 0.713252  | -1.940804 | 3.973855  |
| H | -0.047570 | 0.402966  | 3.734336  |
| H | 1.161898  | 1.954785  | 2.225972  |
| H | -4.992751 | 0.143023  | -1.630053 |
| H | -7.046647 | 0.073238  | -0.251392 |
| H | -7.127376 | -1.334493 | 1.786586  |
| H | -5.160074 | -2.705674 | 2.417106  |
| H | -3.125047 | -2.673978 | 1.014159  |

### 3b' out/out

G(M06-2X/6-311+G\*\*)= -7352.316883  
E(M06-2X/6-311+G\*\*)= -7352.657686

|    |           |           |           |
|----|-----------|-----------|-----------|
| N  | 0.860277  | -2.478356 | 0.252511  |
| C  | 0.549389  | -1.131786 | 0.139580  |
| C  | -0.753199 | -1.055223 | -0.263689 |
| N  | -1.210366 | -2.358394 | -0.399136 |
| C  | -0.220579 | -3.248889 | -0.084234 |
| P  | 1.750005  | 0.150421  | 0.564129  |
| Se | 3.149253  | 0.054980  | -1.268030 |
| C  | 4.734737  | -0.432704 | -0.284007 |
| C  | 5.404537  | -1.608765 | -0.617658 |
| C  | 6.568279  | -1.957132 | 0.062538  |
| C  | 7.052737  | -1.146281 | 1.082928  |
| C  | 6.378570  | 0.024502  | 1.416932  |
| C  | 5.226689  | 0.387985  | 0.729478  |
| P  | -1.805641 | 0.358424  | -0.664711 |
| Se | -3.094505 | 0.570688  | 1.238928  |
| C  | -4.710016 | -0.153882 | 0.473878  |
| C  | -5.284937 | -1.280332 | 1.059548  |
| C  | -6.450821 | -1.818640 | 0.522845  |

|   |           |           |           |
|---|-----------|-----------|-----------|
| C | -7.031903 | -1.246344 | -0.603650 |
| C | -6.454583 | -0.121991 | -1.186303 |
| C | -5.301023 | 0.433147  | -0.643678 |
| C | -2.562274 | -2.778398 | -0.729882 |
| S | -0.313452 | -4.916263 | -0.110405 |
| C | 2.165259  | -3.041546 | 0.555907  |
| C | 0.713136  | 1.566174  | 0.119088  |
| C | -0.586184 | 1.644603  | -0.297305 |
| N | -0.883138 | 2.993598  | -0.435669 |
| C | 0.196295  | 3.763786  | -0.095428 |
| N | 1.176237  | 2.868410  | 0.244572  |
| C | 2.510777  | 3.256722  | 0.665212  |
| S | 0.283146  | 5.432193  | -0.092610 |
| C | -2.162519 | 3.562636  | -0.824804 |
| H | -2.503162 | -3.638739 | -1.394892 |
| H | -3.089070 | -1.959873 | -1.221148 |
| H | -3.099091 | -3.064997 | 0.176098  |
| H | -2.751720 | 3.814783  | 0.058538  |
| H | -1.969404 | 4.466976  | -1.399560 |
| H | -2.700376 | 2.838812  | -1.436630 |
| H | 2.474031  | 4.308628  | 0.941987  |
| H | 2.802760  | 2.656253  | 1.528821  |
| H | 3.225069  | 3.115347  | -0.148594 |
| H | 2.018297  | -3.950077 | 1.137786  |
| H | 2.691181  | -3.288158 | -0.368623 |
| H | 2.750033  | -2.319773 | 1.127044  |
| H | -4.817334 | -1.738345 | 1.923400  |
| H | -6.896612 | -2.693480 | 0.980943  |
| H | -7.933768 | -1.673096 | -1.025518 |
| H | -6.907694 | 0.332015  | -2.059523 |
| H | -4.861507 | 1.318421  | -1.087705 |
| H | 5.018814  | -2.247091 | -1.403996 |
| H | 7.089645  | -2.869356 | -0.201945 |
| H | 7.953995  | -1.423925 | 1.615914  |
| H | 6.754469  | 0.663364  | 2.207144  |
| H | 4.714181  | 1.309391  | 0.977200  |

#### PhTeTePh

G(M06-2X/6-311+G\*\*)= -998.980237

E(M06-2X/6-311+G\*\*)= -999.116604

|    |           |           |           |
|----|-----------|-----------|-----------|
| C  | -0.031069 | 0.230359  | -0.018399 |
| C  | 0.019398  | 0.004254  | 1.354024  |
| C  | 1.254291  | -0.158954 | 1.984150  |
| C  | 2.429207  | -0.097748 | 1.242237  |
| C  | 2.380476  | 0.131846  | -0.128874 |
| C  | 1.149425  | 0.297233  | -0.753726 |
| Te | -1.705149 | -0.176388 | 2.586822  |
| Te | -3.613613 | 0.698734  | 0.933746  |
| C  | -4.014746 | -1.084812 | -0.150308 |

|   |           |           |           |
|---|-----------|-----------|-----------|
| C | -3.050785 | -2.067870 | -0.362601 |
| C | -3.363086 | -3.190482 | -1.123115 |
| C | -4.628303 | -3.331939 | -1.684114 |
| C | -5.587529 | -2.346890 | -1.476208 |
| C | -5.286016 | -1.227157 | -0.706821 |
| H | 1.309810  | -0.329691 | 3.054761  |
| H | 3.383444  | -0.224903 | 1.740198  |
| H | 3.296206  | 0.183327  | -0.705264 |
| H | 1.100749  | 0.477522  | -1.821415 |
| H | -0.983257 | 0.366048  | -0.520354 |
| H | -6.050225 | -0.476111 | -0.535638 |
| H | -6.578025 | -2.451695 | -1.903327 |
| H | -4.866350 | -4.206085 | -2.278025 |
| H | -2.609222 | -3.953257 | -1.280123 |
| H | -2.060305 | -1.971014 | 0.069218  |

### Trans product with PhTeTePh

G(M06-2X/6-311+G\*\*)= -3085.109447  
E(M06-2X/6-311+G\*\*)= -3085.449212

|    |           |           |           |
|----|-----------|-----------|-----------|
| C  | 0.306853  | 3.139221  | -1.280055 |
| C  | -0.680958 | 3.316344  | -0.310044 |
| C  | -2.022202 | 3.414448  | -0.684839 |
| C  | -2.377566 | 3.304813  | -2.023755 |
| C  | -1.395104 | 3.106206  | -2.990994 |
| C  | -0.055241 | 3.035431  | -2.619947 |
| S  | -0.261214 | 3.307094  | 1.420840  |
| P  | -0.261325 | 1.152284  | 1.823973  |
| C  | 1.066302  | 0.572473  | 0.744179  |
| N  | 2.402466  | 0.675094  | 1.111872  |
| C  | 3.207372  | 0.165595  | 0.144307  |
| N  | 2.366301  | -0.258993 | -0.837578 |
| C  | 1.045070  | -0.020882 | -0.489041 |
| C  | 2.897886  | 1.309339  | 2.326301  |
| Te | 5.270400  | 0.048216  | 0.155908  |
| C  | 2.815064  | -0.935807 | -2.046030 |
| P  | -0.321437 | -0.392403 | -1.615886 |
| Te | -0.604277 | -2.882771 | -1.226048 |
| C  | -1.257475 | -2.616645 | 0.760559  |
| C  | -2.624298 | -2.492150 | 1.021536  |
| C  | -3.060604 | -2.169872 | 2.302671  |
| C  | -2.136026 | -1.979830 | 3.326474  |
| C  | -0.774679 | -2.118581 | 3.071308  |
| C  | -0.330757 | -2.433622 | 1.788840  |
| C  | -1.622492 | 0.653746  | 0.752676  |
| N  | -2.940015 | 0.878601  | 1.121542  |
| C  | -3.786435 | 0.540312  | 0.104721  |
| N  | -2.973807 | 0.113996  | -0.910074 |
| C  | -1.643490 | 0.181825  | -0.530040 |
| C  | -3.387750 | 1.391172  | 2.405021  |

|   |           |           |           |
|---|-----------|-----------|-----------|
| C | -3.479672 | -0.344290 | -2.191881 |
| S | -5.459716 | 0.615715  | 0.096610  |
| H | 3.754166  | -0.485304 | -2.363233 |
| H | 2.060051  | -0.813856 | -2.822390 |
| H | 2.976835  | -1.995983 | -1.844250 |
| H | -3.743773 | -1.403100 | -2.143928 |
| H | -4.369262 | 0.235707  | -2.432837 |
| H | -2.713284 | -0.187819 | -2.951338 |
| H | -4.396817 | 1.020593  | 2.578179  |
| H | -2.715983 | 1.030199  | 3.184515  |
| H | -3.398042 | 2.483622  | 2.399618  |
| H | 3.802816  | 0.790442  | 2.637550  |
| H | 3.131468  | 2.357572  | 2.133181  |
| H | 2.135360  | 1.235203  | 3.100989  |
| H | -3.350907 | -2.620789 | 0.226228  |
| H | -4.122667 | -2.055773 | 2.490392  |
| H | -2.476393 | -1.728976 | 4.324651  |
| H | -0.053411 | -1.976344 | 3.867944  |
| H | 0.730792  | -2.529710 | 1.588952  |
| H | -2.784022 | 3.551417  | 0.074650  |
| H | -3.422840 | 3.364910  | -2.305185 |
| H | -1.672359 | 3.017414  | -4.034888 |
| H | 0.711370  | 2.893697  | -3.372991 |
| H | 1.347415  | 3.074179  | -0.981165 |

## References

- [1] Gaussian 09, Revision B.01, M. J. Frisch, G. W. Trucks, H. B. Schlegel, G. E. Scuseria, M. A. Robb, J. R. Cheeseman, G. Scalmani, V. Barone, B. Mennucci, G. A. Petersson, H. Nakatsuji, M. Caricato, X. Li, H. P. Hratchian, A. F. Izmaylov, J. Bloino, G. Zheng, J. L. Sonnenberg, M. Hada, M. Ehara, K. Toyota, R. Fukuda, J. Hasegawa, M. Ishida, T. Nakajima, Y. Honda, O. Kitao, H. Nakai, T. Vreven, J. A. Montgomery, Jr., J. E. Peralta, F. Ogliaro, M. Bearpark, J. J. Heyd, E. Brothers, K. N. Kudin, V. N. Staroverov, T. Keith, R. Kobayashi, J. Normand, K. Raghavachari, A. Rendell, J. C. Burant, S. S. Iyengar, J. Tomasi, M. Cossi, N. Rega, J. M. Millam, M. Klene, J. E. Knox, J. B. Cross, V. Bakken, C. Adamo, J. Jaramillo, R. Gomperts, R. E. Stratmann, O. Yazyev, A. J. Austin, R. Cammi, C. Pomelli, J. W. Ochterski, R. L. Martin, K. Morokuma, V. G. Zakrzewski, G. A. Voth, P. Salvador, J. J. Dannenberg, S. Dapprich, A. D. Daniels, O. Farkas, J. B. Foresman, J. V. Ortiz, J. Cioslowski, D. J. Fox, Gaussian Inc., Wallingford CT, **2010**
- [2] F. Weigend, R. Ahlrichs, *Phys. Chem. Chem. Phys.*, **2005**, 7 3297. For the ECP : K. A. Peterson, D. Figgen, E. Goll, H. Stoll, M. Dolg *J. Chem. Phys.*, **2003**, 119, 11113.
- [3] G. Schaftenaar, J. H. Noordik, *J. Comput. Aided Mol. Design* **2000**, 14, 123.
